# Supplementary material for: The outcomes of biliary drainage by percutaneous transhepatic cholangiography for the palliation of malignant biliary obstruction in England between 2001 and 2014: a retrospective cohort study
Source: PubMed Central journal article supplement — BMJ Open. 2020 Jan 23;10(1):e033576. doi: 10.1136/bmjopen-2019-033576 (PMC7045186; doi:10.1136/bmjopen-2019-033576), 2020-01-23
Supplement: bmjopen-2019-033576.draft_revisions.pdf [file bmjopen-2019-033576.draft_revisions.pdf]

# BMJ Open

BMJ Open is committed to open peer review. As part of this commitment we make the peer review history of every article we publish publicly available.

When an article is published we post the peer reviewers' comments and the authors' responses online. We also post the versions of the paper that were used during peer review. These are the versions that the peer review comments apply to.

The versions of the paper that follow are the versions that were submitted during the peer review process. They are not the versions of record or the final published versions. They should not be cited or distributed as the published version of this manuscript.

BMJ Open is an open access journal and the full, final, typeset and author-corrected version of record of the manuscript is available on our site with no access controls, subscription charges or pay-per-view fees (<http://bmjopen.bmj.com>).

If you have any questions on BMJ Open's open peer review process please email [info.bmjopen@bmj.com](mailto:info.bmjopen@bmj.com)

# BMJ Open

## The outcomes of biliary drainage by percutaneous transhepatic cholangiography for the palliation of malignant biliary obstruction in England between 2001 and 2014

|                               |                                                                                                                                                                                                                                                                                                                                                                                                                                                                                                                                                                        |
|-------------------------------|------------------------------------------------------------------------------------------------------------------------------------------------------------------------------------------------------------------------------------------------------------------------------------------------------------------------------------------------------------------------------------------------------------------------------------------------------------------------------------------------------------------------------------------------------------------------|
| Journal:                      | <i>BMJ Open</i>                                                                                                                                                                                                                                                                                                                                                                                                                                                                                                                                                        |
| Manuscript ID                 | bmjopen-2019-033576                                                                                                                                                                                                                                                                                                                                                                                                                                                                                                                                                    |
| Article Type:                 | Research                                                                                                                                                                                                                                                                                                                                                                                                                                                                                                                                                               |
| Date Submitted by the Author: | 12-Aug-2019                                                                                                                                                                                                                                                                                                                                                                                                                                                                                                                                                            |
| Complete List of Authors:     | Rees, James; Dudley Group of Hospitals NHS Trust, Gastroenterology Mytton, Jemma; University Hospitals Birmingham , Evison, Felicity; University Hospitals Birmingham NHS Foundation Trust, Department of Health Informatics<br>Mangat, Kamarjit; National University Hospital, Department of Diagnostic Imaging; University Hospitals Birmingham , Department of Radiology<br>Patel, Prashant; University of Birmingham, Institute of Cancer and Genomic Science<br>Trudgill, Nigel; Sandwell and West Birmingham Hospitals NHS Trust, Department of Gastroenterology |
| Keywords:                     | Gastrointestinal tumours < GASTROENTEROLOGY, Hepatobiliary tumours < ONCOLOGY, Adult palliative care < PALLIATIVE CARE, Interventional radiology < RADIOLOGY & IMAGING                                                                                                                                                                                                                                                                                                                                                                                                 |
|                               |                                                                                                                                                                                                                                                                                                                                                                                                                                                                                                                                                                        |

SCHOLARONE™  
Manuscripts

1  
2  
3  
4  
5  
6 **The outcomes of biliary drainage by percutaneous transhepatic cholangiography**  
7 **for the palliation of malignant biliary obstruction in England between 2001 and**  
8 **2014**  
9

10 **J. Rees<sup>1</sup>, J. Mytton<sup>2</sup>, F. Evison<sup>2</sup>, K. Mangat<sup>3, 4</sup>, P. Patel<sup>5</sup>, N. Trudgill<sup>6</sup>**  
11  
12

13 1 Department of Gastroenterology, Russells Hall Hospital, Pensnett Road, Dudley,  
14 West Midlands, United Kingdom, DY1 2HQ

15 2 University Hospital Birmingham NHS Foundation Trust, Health Informatics  
16 Birmingham, Birmingham, UK

17 3 Department of Diagnostic Imaging, National University Hospital, 5 Lower Kent  
18 Ridge Road, Singapore, 119074

19 4 Department of Radiology, University Hospital Birmingham NHS Foundation Trust,  
20 Mindelsohn Way, Edgbaston, Birmingham, United Kingdom, B152TH

21 5 University of Birmingham, Institute of Cancer and Genomic Science, Edgbaston,  
22 Birmingham, United Kingdom, B152TT

23 6 Department of Gastroenterology, Sandwell General Hospital, Lyndon, West  
24 Bromwich, Birmingham, United Kingdom, B714HJ  
25  
26  
27  
28  
29  
30  
31  
32  
33  
34

35 Word count: 3459 words (excluding abstract and references, statements, figures and  
36 tables)  
37  
38  
39  
40  
41  
42  
43  
44  
45

46 Corresponding author:

47 Dr. Nigel Trudgill

48 Department of Gastroenterology

49 Sandwell General Hospital,

50 Lyndon,

51 West Bromwich,

52 United Kingdom, B71 4HJ

53 Tel: 01215072577

54 Email [nigel.trudgill@nhs.net](mailto:nigel.trudgill@nhs.net)  
55  
56  
57  
58  
59  
60

## ABSTRACT

### Introduction

Relieving obstructive jaundice in inoperable pancreato-biliary cancers improves quality of life and permits chemotherapy. Percutaneous transhepatic cholangiography (PTC) with drainage and/or stenting relieves jaundice but can be associated with significant morbidity and mortality. Percutaneous transhepatic biliary drainage (PTBD) in malignant biliary obstruction was therefore examined in a national cohort to establish risk factors for poor outcomes.

### Method

Retrospective study of adult subjects undergoing PTBD for palliation of pancreato-biliary cancer in England between 2001 and 2014, identified from Hospital Episode Statistics (HES). Multivariate logistic regression analysis was used to examine associations with mortality and the need for a repeat PTBD within 2 months.

### Results

16,822 subjects analysed (median age 72 (range 19-104) years, 50.3% male). 58% pancreatic and 30% biliary tract cancer. In-hospital and 30-day mortality were 15.3 (95% CI 14.7 - 15.9)% and 23.1 (22.4 - 23.8)% respectively. 20.2% suffered a coded complication within 3 months. Factors associated with 30-day mortality: age ( $\geq 81$  years odds ratio 2.68 (95% CI 2.37-3.03),  $p < 0.001$ ), increasing comorbidity (Charlson score 20+, 3.10 (2.64-3.65)),  $p < 0.001$ ), pre-existing renal dysfunction (2.37 (2.12-2.65),  $p < 0.001$ ) and non-pancreatic cancer (unspecified biliary tract 1.28 (1.08-1.52),  $p = 0.004$ ). Females had lower mortality (0.91 (0.84-0.98),  $p = 0.011$ ), as did subjects undergoing PTBD in a 'higher volume' provider (84-180 PTBDs per year 0.68 (0.58-0.79),  $p < 0.001$ ).

### Conclusion

In subjects undergoing PTBD for the palliation of malignant biliary obstruction, 30-day mortality was high at 23.1%. Mortality was higher in older subjects, males, those with increasing comorbidity, a cancer site other than pancreas and at 'lower-volume' PTBD providers.

**Abstract word count: 249**

**Keywords: Gastrointestinal tumours, hepatobiliary tumours, adult palliative care, interventional radiology**

## STRENGTHS AND LIMITATIONS OF THIS STUDY

- This is the largest study to date examining the outcomes of patients undergoing PTBD for unresectable biliary tract obstruction.
- Use of HES database ensures high quality diagnostic, procedural and mortality data at a national level.
- Diagnostic and procedural coding relevant to study locally validated, confirming a high level of accuracy.
- Accuracy of HES database dependent on quality of medical records and the staff coding the records.
- Information relevant to use of PTBD not recorded in HES includes pathology results, use of antibiotics, technical details of PTBD and seniority/experience of radiologist performing procedure.

## INTRODUCTION

Jaundice may arise from biliary obstruction by cholangiocarcinoma, pancreatic, duodenal, gallbladder or primary or secondary liver malignancies. The majority of such patients present at a late stage and are unsuitable for curative surgery. Biliary obstruction may impair quality of life and result in pruritus, cholangitis and liver failure, (1,2). In patients who are unsuitable for curative resection, relief of obstructive jaundice improves quality of life, (3,4). Furthermore, biliary drainage can be a bridge to palliative chemotherapy, improving survival in locally advanced and metastatic pancreatic cancer, (5) and in advanced biliary tract cancer, (6,7).

Biliary drainage can be achieved surgically, via endoscopic retrograde cholangiopancreatography (ERCP) or via percutaneous transhepatic cholangiography (PTC). The approach employed will depend on whether the cancer is operable and its location. PTC facilitates external and internal biliary tree drainage and is the primary method of relieving biliary obstruction for malignant lesions above the level of the common hepatic duct, (8) or when ERCP has failed to relieve more distal obstruction. However, percutaneous transhepatic biliary drainage (PTBD) is associated with significant mortality and morbidity, with complications reported to be as high as 30%, including cholangitis, sepsis, haemorrhage and stent blockage, (2).

Case series and randomized controlled trials examining outcomes of PTBD in malignancy have typically involved less than 100 subjects. National data were therefore used to examine unselected outcomes for PTBD in a very large cohort of inoperable pancreato-biliary cancer to establish factors associated with poor outcomes, such as early mortality.

## METHODS

### Data source

Hospital Episode Statistics (HES) is an administrative database that records all elective and emergency care episodes in English National Health Service hospitals. A unique identifier allows individuals to be followed through their hospital admissions and outpatient attendances. Each recorded episode contains diagnostic, procedural, demographic, administrative and geographical information. Diagnostic data is coded using the International Classification of Diseases version 10 (ICD-10) and procedures coded using the Office of Population Censuses and Surveys Classification of Interventions and Procedures 4<sup>th</sup> revision (OPCS-4). HES is linked to the Office of National Statistics (ONS) mortality data, providing information on date and cause of death, (9).

### Study population

#### Inclusion criteria

All subjects aged over 18 years undergoing PTBD between 2001 and 2014 with a diagnosis of cancer of the pancreas, gallbladder, liver, intrahepatic bile ducts, small bowel or unspecified bile duct cancer were included. PTBD and diagnosis data was identified by OPCS-4 (*appendix 1*) and ICD-10 (*appendix 2*) coding respectively. All analyses relate to the first PTBD each subject underwent.

#### Exclusion criteria

Subjects were excluded if they were diagnosed with cancer more than two years prior to their first PTBD or more than 6 months after their first procedure in order to exclude subjects with potentially incorrectly coded diagnoses and to allow for delays in coding of a cancer diagnosis. Subjects who went on to have a surgical resection of their malignancy after PTBD were identified by OPCS-4 coding and were excluded (*appendix 3*), as were those with incomplete demographic data.

### Patient and Public involvement

This research was carried out without patient or public involvement.

### Validation of PTBD population

To assess the validity of the PTBD population, the number of PTBDs undertaken at University Hospital Birmingham (UHB) between April 2009 and April 2014 that met the study criteria were extracted from the UHB radiology database and compared to the number of PTBDs coded in HES at UHB for the same period.

## **Study variables and data extraction**

### **Demographics**

Demographic data including age, gender and ethnicity were extracted from coding at the time of PTBD. Age was divided into quintiles. Ethnicity was classified into White, Asian or Asian British, Black or Black British, Mixed, any other ethnic group and unknown.

### **Comorbidity**

The Charlson co-morbidity index was calculated using ICD-10 codes for secondary diagnoses, excluding any form of cancer, and divided into five categories by number of comorbidities. The derivation of Charlson score from ICD-10 coding in HES has previously been assessed and found to be valid for assessing comorbidity in patients undergoing surgery for urological cancer. There was an 83% agreement between Charlson scores derived from ICD-10 coding in HES and those derived from ICD-9 comorbidity codes, (10).

### **Socio-economic status**

Deprivation was assessed using the Index of Multiple Deprivations 2007, which is calculated from an aggregate score for each English Lower Layer Super Output Area (LSOA), based on income, employment, health, education, training and skills, barriers to housing and services, crime and living environment, (11). Subjects' LSOAs are recorded in HES based on postcode of residence and deprivation was analysed in quintiles, with 1 being the most and 5 the least deprived.

### **Healthcare provider**

Healthcare providers were stratified by their PTBD volume per year into quintiles.

### **ERCP**

Subjects who had undergone an ERCP prior to their PTBD were identified by OPCS-4 coding (*appendix 4*).



## Outcomes

Outcomes were calculated from the date of the first PTBD and included in-hospital, 7 and 30-day mortality and median survival. Emergency readmissions into any hospital within 30 days of discharge post-PTBD were also identified. The proportion of subjects that suffered complications related to PTBD were identified using ICD-10 coding (*appendix 5*). Subjects undergoing chemotherapy after their PTBD were identified by ICD-10 (Z080, Z511, Z542, Z926) and OPCS 4 codes (X70, X71, X72, X73, X352, X384).

## Ethics

HES includes only pseudonymised data and therefore ethical approval is not necessary. It is available under a data sharing agreement for the purposes of service evaluation.

## Statistical analysis

All statistical analyses were carried out using STATA SE v14 (College Station Tx: StataCorp LP). Univariate analysis was performed to identify variables to be included in the final regression models, using  $\chi^2$  tests for categorical variables. A multivariate model was produced to examine associations with mortality following adjustment for the variables identified on univariate analyses. A further multivariate model was produced to examine associations with needing a further PTBD procedure, adjusting for the list of variables identified on Univariate analysis. P-values of <0.05 were considered statistically significant. Odds ratios, 95% confidence intervals and p values were generated from the multivariate model. Unadjusted Kaplan Meier analysis was undertaken for 7-day and 30-day mortality, split by age quintile.

## RESULTS

### Study population

Between 2001 and 2014, 19,525 subjects underwent PTBD for one of the study malignancies. 1,006 subjects were diagnosed with cancer more than two years before or more than 6 months after their PTBD and were excluded. A further 1,438 subjects who underwent potentially curative resection after their PTBD and 259 subjects with incomplete demographic data were also excluded, giving a final study population of 16,822 (*Figure 1*).

### Subject characteristics

The characteristics of the study population and excluded subjects are shown in table 1. 50.3% of subjects were male and the median age was 72 (range 19 to 104) years. 58% of subjects had pancreatic cancer, with malignant neoplasm of the liver and intrahepatic bile ducts accounting for 30.1% of subjects, of whom 90.4% had a diagnosis of cholangiocarcinoma. 86.3% of subjects underwent only one procedure, with a range from one to fifteen and 61.8% had undergone a previous ERCP.

**Table 1 Study and excluded subject characteristics**

|                        |                                                                          | Included subjects | Excluded subjects | p-value |
|------------------------|--------------------------------------------------------------------------|-------------------|-------------------|---------|
| Sex                    | Male                                                                     | 8465 (50.3%)      | 527 (52.4%)       | 0.203   |
|                        | Female                                                                   | 8357 (49.7%)      | 479 (47.6%)       |         |
| Age                    | < 61                                                                     | 3267 (19.4%)      | 237 (23.6%)       | 0.005   |
|                        | 62 to 68                                                                 | 3082 (18.3%)      | 173 (17.2%)       |         |
|                        | 69 to 74                                                                 | 3253 (19.3%)      | 179 (17.8%)       |         |
|                        | 75 to 80                                                                 | 3412 (20.3%)      | 219 (21.8%)       |         |
|                        | ≥81                                                                      | 3808 (22.6%)      | 198 (19.7%)       |         |
| Deprivation            | 1                                                                        | 3258 (19.4%)      | 183 (18.2%)       | 0.08    |
|                        | 2                                                                        | 3284 (19.7%)      | 199 (19.8%)       |         |
|                        | 3                                                                        | 3356 (19.5%)      | 189 (18.8%)       |         |
|                        | 4                                                                        | 3453 (20.5%)      | 201 (20.0%)       |         |
|                        | 5                                                                        | 3343 (19.9%)      | 225 (22.4%)       |         |
|                        | Unknown                                                                  | 71 (0.4%)         | 9 (0.9%)          |         |
| Ethnic Group           | White                                                                    | 13190 (78.4%)     | 848 (84.3%)       | <0.001  |
|                        | Asian or Asian British                                                   | 348 (2.1%)        | 22 (2.2%)         |         |
|                        | Black or Black British                                                   | 271 (1.6%)        | 11 (1.1%)         |         |
|                        | Mixed                                                                    | 32 (0.2%)         | *                 |         |
|                        | Any other ethnic group                                                   | 184 (1.1%)        | 11 (1.1%)         |         |
|                        | Unknown                                                                  | 2797 (16.6%)      | 111 (11.0%)       |         |
| Comorbidities          | < 5                                                                      | 9456 (56.2%)      | 660 (65.6%)       | <0.001  |
|                        | 5 to 10                                                                  | 1953 (11.6%)      | 104 (10.3%)       |         |
|                        | 10 to 15                                                                 | 3519 (20.9%)      | 153 (15.2%)       |         |
|                        | 15 to 20                                                                 | 1128 (6.7%)       | 54 (5.4%)         |         |
|                        | > 20                                                                     | 766 (4.6%)        | 35 (3.5%)         |         |
| Type of Cancer         | C17 - Malignant Neoplasm of Small Intestine                              | 526 (3.1%)        | 41 (4.1%)         | <0.001  |
|                        | C22 - Malignant Neoplasm of Liver and Intrahepatic Bile Ducts            | 5069 (30.1%)      | 332 (33.0%)       |         |
|                        | C23 - Malignant Neoplasm of Gallbladder                                  | 715 (4.3%)        | 45 (4.5%)         |         |
|                        | C24 - Malignant Neoplasm of other and unspecified parts of biliary tract | 762 (4.5%)        | 74 (7.4%)         |         |
|                        | C25 - Malignant Neoplasm of Pancreas                                     | 9750 (58%)        | 514 (51.1%)       |         |
| Previous renal failure |                                                                          | 1747 (10.4%)      | 128 (12.7%)       |         |
| Previous ERCP          |                                                                          | 10384 (61.8%)     | 631 (62.7%)       |         |

## Validation

The number of PTBDs meeting the study criteria at UHB between April 2009 and April 2014 was 321 and the number of PTBDs coded in HES for UHB in the same time period was 305 (95%), suggesting misclassification in HES is unlikely. Univariate analysis comparing excluded and included subjects is in table 1. There was no difference in gender between excluded and included subjects. Excluded subjects were younger (under 61 years of age (23.6% vs. 19.4%,  $p=0.005$ ),) more likely to be white (84.3% vs. 78.4%,  $p<0.001$ ), have less comorbidities (<5 65.6% vs. 56.2%,  $p<0.001$ ) and were less likely to have pancreatic cancer (51.1% vs. 58%,  $p<0.001$ ). Only 259 (1.3%) out of 19,525 subjects were excluded for incomplete demographic data.

## Crude mortality and emergency readmission rates

5.2 (95% CI 4.9-5.6)% of subjects died within 7 days of PTBD, 15.3 (95% CI 14.7 – 15.9)% died in hospital and 23.1 (95% CI 22.4 – 23.8)% died within 30 days of their first PTBD. Median survival was 92 (IQR 33 – 242) days and the median length of stay after PTBD was 9 (IQR 4 – 16) days. The emergency readmission rate within 30 days was 20.8 (95% CI 20.1-21.5)%.

## Complications

5.9% of subjects suffered a complication within 7 days of their PTBD, and 20% within 3 months (Supplementary table 1). Infection was the most common complication with 2.4% of subjects experiencing this within a week, and 9% within a month (cholangitis 3.9%, sepsis 3.9%, bacterial infection of unspecified site 0.8%, cholecystitis 0.4%). 2.9% of subjects had a code for stent displacement or blockage (mean time to stent blockage or displacement 6.3 (SD 8.6) months) and 2.1% for gastrointestinal haemorrhage. The rate of post-PTBD acute kidney injury was 0.9% within 7 days and 2.4% within 3 months.

## Chemotherapy

38.7% of subjects under the age of 61 were coded as undergoing chemotherapy after their PTBD (table 2). This was less common in older subjects: 62 – 68 years (30.4%), 69-74 (23.7%), 75-80 (13.5%) and  $\geq 81$  (2.5%) ( $p<0.001$ ). Subjects with pancreatic cancer were the most likely to receive chemotherapy at 22.8%. Over the time period studied, more subjects received chemotherapy after PTBD (2001/2002 13.1%, 2013/2014 27.3% ( $p<0.001$ )).

**Table 2 Rates of pre- and post-percutaneous transhepatic biliary drainage chemotherapy by age, cancer type and year of procedure**

| Type of Cancer                                                                  | Number of subjects who had chemotherapy pre-PTBD | Number of subjects who had chemotherapy post-PTBD | P-value |
|---------------------------------------------------------------------------------|--------------------------------------------------|---------------------------------------------------|---------|
| <b>C17 - Malignant Neoplasm of Small Intestine</b>                              | 73 (13.9%)                                       | 100 (19%)                                         | <0.001  |
| <b>C22 – Malignant Neoplasm of Liver and Intrahepatic Bile Ducts</b>            | 251 (5%)                                         | 1011 (19.9%)                                      |         |
| <b>C23 – Malignant Neoplasm of Gallbladder</b>                                  | 62 (8.7%)                                        | 122 (17.1%)                                       |         |
| <b>C24 – Malignant Neoplasm of other and unspecified parts of biliary tract</b> | 24 (3.1%)                                        | 76 (10%)                                          |         |
| <b>C25 Malignant Neoplasm of Pancreas</b>                                       | 855 (8.8%)                                       | 2219 (22.8%)                                      |         |
| <b>Age Group</b>                                                                |                                                  |                                                   |         |
| <61                                                                             | 462 (14.1%)                                      | 1263 (38.7%)                                      | <0.001  |
| 62-68                                                                           | 352 (11.4%)                                      | 937 (30.4%)                                       |         |
| 69-74                                                                           | 279 (8.6%)                                       | 771 (23.7%)                                       |         |
| 75-80                                                                           | 127 (3.7%)                                       | 461 (13.5%)                                       |         |
| ≥81                                                                             | 45 (1.2%)                                        | 96 (2.5%)                                         |         |
| <b>Year of PTBD</b>                                                             |                                                  |                                                   |         |
| 2001/2002                                                                       | 18 (2.0%)                                        | 115 (13.1%)                                       | <0.001  |
| 2002/2003                                                                       | 48 (4.9%)                                        | 137 (13.9%)                                       |         |
| 2003/2004                                                                       | 44 (4.8%)                                        | 142 (15.4%)                                       |         |
| 2004/2005                                                                       | 68 (6.6%)                                        | 173 (16.8%)                                       |         |
| 2005/2006                                                                       | 53 (4.7%)                                        | 206 (18.4%)                                       |         |
| 2006/2007                                                                       | 73 (6.0%)                                        | 247 (20.5%)                                       |         |
| 2007/2008                                                                       | 118 (8.9%)                                       | 286 (21.6%)                                       |         |
| 2008/2009                                                                       | 98 (7.1%)                                        | 305 (22.0%)                                       |         |
| 2009/2010                                                                       | 144 (9.2%)                                       | 345 (22.0%)                                       |         |
| 2010/2011                                                                       | 152 (9.6%)                                       | 362 (22.8%)                                       |         |
| 2011/2012                                                                       | 145 (8.9%)                                       | 384 (23.7%)                                       |         |
| 2012/2013                                                                       | 149 (9.4%)                                       | 387 (24.5%)                                       |         |
| 2013/2014                                                                       | 155 (9.6%)                                       | 439 (27.3%)                                       |         |

## Univariate regression analysis

Age, gender, comorbidity, deprivation, pre-existing renal failure, type of cancer, year of procedure and provider PTBD volume were all found to be associated with mortality and adjusted for in the subsequent multivariate analyses (Supplementary tables 2 and 3).

## Multivariate regression analysis

### Demographic factors and mortality

The results of the multivariate regression analysis for demographic factors associated with mortality are shown in table 3. Age was strongly associated with mortality, with the  $\geq 81$  age group having the highest 7-day (2.87 (95% CI 2.23-3.69)  $p < 0.001$ ), in-hospital (3.47 (95% CI 2.97-4.05),  $p < 0.001$ ) and 30-day mortality (2.68 (95% CI 2.37-3.03),  $p < 0.001$ ). The effect of age on 30-day mortality can be seen in figure 2. Females had a better outlook, with lower 7-day (0.82 (95% CI 0.71-0.95),  $p = 0.007$ ) and 30-day mortality (0.91 (95% CI 0.84-0.98),  $p = 0.011$ ).

30-day mortality was associated with deprivation (1.28 (95% CI 1.13-1.44),  $p < 0.001$ ), increased comorbidity (Charlson index 20+, 3.10 (95% CI 2.64-3.65),  $p < 0.001$ ) and pre-existing renal dysfunction (2.37 (95% CI 2.12-2.65),  $p < 0.001$ ), with 7-day mortality following a similar pattern.

Subjects with unspecified bile duct cancer (1.28 (95% CI 1.08-1.52),  $p = 0.004$ ) or liver and intrahepatic bile duct cancer (1.14 (95% CI 1.14-1.24),  $p = 0.004$ ) had a higher 30-day mortality than those with pancreatic cancer. Subjects undergoing ERCP prior to PTBD also had lower 30-day mortality (0.90 (95% CI 0.83-0.97),  $p = 0.007$ ).

**Table 3 Multivariate regression analysis of demographic factors associated with mortality following percutaneous transhepatic biliary drainage for unresectable malignant disease**

|                        |                                                                          | In-hospital mortality |         | 7-day mortality    |         | 30-Day Mortality   |         |
|------------------------|--------------------------------------------------------------------------|-----------------------|---------|--------------------|---------|--------------------|---------|
|                        |                                                                          | Odds Ratio            | P-value | Odds ratio         | P-value | Odds Ratio         | P-value |
| Age Group              | < 61                                                                     | 1 (baseline)          |         | 1 (baseline group) |         | 1 (baseline)       |         |
|                        | 62 to 68                                                                 | 1.49 (1.25-1.77)      | <0.001  | 1.28 (0.96-1.71)   | 0.095   | 1.33 (1.16-1.52)   | <0.001  |
|                        | 69 to 74                                                                 | 1.66 (1.40-1.96)      | <0.001  | 1.58 (1.20-2.08)   | 0.001   | 1.43 (1.25-1.63)   | <0.001  |
|                        | 75 to 80                                                                 | 2.36 (2.01-2.77)      | <0.001  | 2.20 (1.70-2.85)   | <0.001  | 1.89 (1.66-2.15)   | <0.001  |
|                        | ≥81                                                                      | 3.47 (2.97-4.05)      | <0.001  | 2.87 (2.23-3.69)   | <0.001  | 2.68 (2.37-3.03)   | <0.001  |
| Sex                    | Male                                                                     | 1 (baseline group)    |         | 1 (baseline group) |         | 1 (baseline group) |         |
|                        | Female                                                                   | 0.98 (0.89-1.07)      | 0.62    | 0.82 (0.71-0.95)   | 0.007   | 0.91 (0.84-0.98)   | 0.011   |
| Comorbidity Score      | < 5                                                                      | 1 (baseline group)    |         | 1 (baseline group) |         | 1 (baseline group) |         |
|                        | 5 to 10                                                                  | 1.39 (1.21-1.61)      | <0.001  | 1.46 (1.16-1.82)   | 0.001   | 1.38 (1.23-1.56)   | <0.001  |
|                        | 10 to 15                                                                 | 1.65 (1.47-1.85)      | <0.001  | 1.72 (1.44-2.06)   | <0.001  | 1.96 (1.78-2.16)   | <0.001  |
|                        | 15 to 20                                                                 | 2.15 (1.82-2.54)      | <0.001  | 2.12 (1.65-2.72)   | <0.001  | 2.29 (1.99-2.65)   | <0.001  |
|                        | 20+                                                                      | 2.96 (2.48-3.53)      | <0.001  | 2.76 (2.15-3.55)   | <0.001  | 3.10 (2.64-3.65)   | <0.001  |
| Deprivation Score      | 1 (most deprived)                                                        | 1.49 (1.29-1.72)      | <0.001  | 1.31 (1.05-1.64)   | 0.017   | 1.28 (1.13-1.44)   | <0.001  |
|                        | 2                                                                        | 1.31 (1.13-1.51)      | <0.001  | 1.12 (0.89-1.41)   | 0.32    | 1.21 (1.07-1.37)   | 0.002   |
|                        | 3                                                                        | 1.08 (0.94-1.36)      | 0.273   | 1.09 (0.87-1.36)   | 0.472   | 1.01 (0.90-1.29)   | 0.863   |
|                        | 4                                                                        | 1.18 (1.02-1.36)      | 0.026   | 1.06 (0.85-1.33)   | 0.601   | 1.14 (1.01-1.29)   | 0.03    |
|                        | 5 (least deprived)                                                       | 1 (baseline group)    |         | 1 (baseline group) |         | 1 (baseline group) |         |
| Previous renal failure |                                                                          | 3.48 (3.09-3.92)      | <0.001  | 2.94 (2.48-3.50)   | <0.001  | 2.37 (2.12-2.65)   | <0.001  |
| Type of Cancer         | C17 - Malignant Neoplasm of Small Intestine                              | 1.36 (1.07-1.73)      | 0.013   | 1.52 (1.07-2.15)   | 0.019   | 1.16 (0.94-1.44)   | 0.161   |
|                        | C22 - Malignant Neoplasm of Liver and Intrahepatic Bile Ducts            | 1.26 (1.14-1.39)      | <0.001  | 1.07 (0.91-1.26)   | 0.403   | 1.14 (1.04-1.24)   | 0.004   |
|                        | C23 - Malignant Neoplasm of Gallbladder                                  | 1.30 (1.05-1.61)      | 0.018   | 1.09 (0.76-1.56)   | 0.639   | 1.18 (0.98-1.42)   | 0.077   |
|                        | C24 - Malignant Neoplasm of other and unspecified parts of biliary tract | 1.33 (1.09-1.61)      | 0.005   | 1.16 (0.86-1.57)   | 0.336   | 1.28 (1.08-1.52)   | 0.004   |
|                        | C25 - Malignant Neoplasm of Pancreas                                     | 1 (baseline group)    |         | 1 (baseline group) |         | 1 (baseline group) |         |
| Previous ERCP          |                                                                          | 0.90 (0.82-0.99)      | 0.026   | 0.93 (0.80-1.08)   | 0.332   | 0.90 (0.83-0.97)   | 0.007   |

### Procedural factors and mortality

The results of the multivariate regression analysis of procedural factors associated with mortality are shown in table 4. There was a five-fold variation in 30-day mortality between providers, ranging from 9.1% to 50%. Compared with providers undertaking 1-15 PTBDs per year, there was a significantly decreased in-hospital and 30-day mortality in providers performing 28 – 43 PTBDs per year (0.72 (95% CI 0.62-0.83),  $p<0.001$  and 0.79 (95% CI 0.69-0.89),  $p<0.001$  respectively). In providers performing more than 44 PTBDs per year, there was an even larger decrease in in-hospital (0.68 (95% CI 0.57-0.82),  $p<0.001$ ), 7-day (0.54 (95% CI 0.40-0.74),  $p<0.001$ ) and 30-day mortality 0.63 (95% CI 0.54-0.74),  $p<0.001$ ).

The day of procedure had little influence on mortality with only Sunday having a higher in-hospital (2.54 (95% CI 1.66-3.91),  $p<0.001$ ) and 30-day mortality (2.20 (95% CI 1.47-3.28),  $p<0.001$ ) compared to Monday to Thursday. However, the number of subjects who had a PTBD on a Sunday was very small at 114 (0.7%) and therefore these results should be treated with caution. In-hospital mortality post-PTBD on multivariate analysis fell over the period studied, with persistently lower in-hospital mortality between 2013 and 2014 (0.58 (95% CI 0.45-0.74),  $p<0.001$ ) compared to 2001/2002.



**Table 4 Multivariate regression analysis of procedural factors associated with mortality following percutaneous transhepatic biliary drainage for unresectable malignant disease**

|                                |                                      | In-hospital mortality |         | 7-Day Mortality    |         | 30-day mortality   |         |
|--------------------------------|--------------------------------------|-----------------------|---------|--------------------|---------|--------------------|---------|
|                                |                                      | Odds Ratio            | P-value | Odds Ratio         | P-value | Odds Ratio         | P-value |
| PTBD Volume per year           | ≤15                                  | 1 (baseline group)    |         | 1 (baseline group) |         | 1 (baseline group) |         |
|                                | 16 to 27                             | 0.79 (0.69-0.90)      | 0.001   | 0.92 (0.76-1.13)   | 0.44    | 0.93 (0.83-1.04)   | 0.218   |
|                                | 28 to 43                             | 0.72 (0.62-0.83)      | <0.001  | 0.81 (0.65-1.01)   | 0.063   | 0.79 (0.69-0.89)   | <0.001  |
|                                | 44 to 83                             | 0.68 (0.57-0.82)      | <0.001  | 0.54 (0.40-0.74)   | <0.001  | 0.63 (0.54-0.74)   | <0.001  |
|                                | 84 to 180                            | 0.68 (0.57-0.82)      | <0.001  | 0.71 (0.52-0.95)   | 0.023   | 0.68 (0.58-0.79)   | <0.001  |
| Pancreaticoduodenectomy Volume | ≤1                                   | 1 (baseline group)    |         | 1 (baseline group) |         | 1 (baseline group) |         |
|                                | 2 to 7                               | 0.96 (0.84-1.11)      | 0.603   | 0.91 (0.73-1.12)   | 0.364   | 0.90 (0.80-1.01)   | 0.073   |
|                                | 8 to 23                              | 1.08 (0.94-1.24)      | 0.278   | 0.97 (0.79-1.20)   | 0.79    | 0.99 (0.88-1.11)   | 0.814   |
|                                | 24 to 30                             | 1.12 (0.93-1.35)      | 0.226   | 0.88 (0.66-1.18)   | 0.397   | 0.93 (0.80-1.09)   | 0.377   |
|                                | 30 to 86                             | 1.01 (0.83-1.22)      | 0.96    | 0.87 (0.64-1.18)   | 0.371   | 0.95 (0.81-1.12)   | 0.549   |
| Day of Procedure               | Monday to Thursday                   | 1 (baseline group)    |         | 1 (baseline group) |         | 1 (baseline group) |         |
|                                | Friday                               | 1.09 (0.99-1.20)      | 0.089   | 0.93 (0.79-1.09)   | 0.346   | 0.99 (0.91-1.08)   | 0.794   |
|                                | Saturday                             | 1.16 (0.78-1.71)      | 0.464   | 1.18 (0.64-2.16)   | 0.596   | 1.05 (0.75-1.48)   | 0.776   |
|                                | Sunday                               | 2.54 (1.66-3.91)      | <0.001  | 3.69 (2.16-6.30)   | <0.001  | 2.20 (1.47-3.28)   | <0.001  |
|                                | Bank Holiday or Bank Holiday Weekend | 1.26 (0.98-1.61)      | 0.075   | 0.99 (0.65-1.51)   | 0.956   | 0.99 (0.79-1.25)   | 0.959   |
| Year of PTC                    | 2001/2                               | 1 (baseline group)    |         | 1 (baseline group) |         | 1 (baseline group) |         |
|                                | 2002/3                               | 1.11 (0.86-1.44)      | 0.426   | 1.15 (0.75-1.76)   | 0.526   | 1.05 (0.84-1.31)   | 0.669   |
|                                | 2003/4                               | 1.11 (0.85-1.45)      | 0.424   | 1.45 (0.96-2.19)   | 0.081   | 1.05 (0.84-1.31)   | 0.687   |
|                                | 2004/5                               | 1.07 (0.82-1.38)      | 0.635   | 1.02 (0.66-1.58)   | 0.913   | 1.03 (0.83-1.29)   | 0.775   |
|                                | 2005/6                               | 1.14 (0.88-1.47)      | 0.319   | 1.24 (0.83-1.87)   | 0.297   | 1.08 (0.87-1.34)   | 0.468   |
|                                | 2006/7                               | 1.03 (0.80-1.33)      | 0.803   | 1.04 (0.69-1.58)   | 0.852   | 1.03 (0.83-1.27)   | 0.82    |
|                                | 2007/8                               | 0.90 (0.70-1.16)      | 0.411   | 0.88 (0.58-1.33)   | 0.539   | 0.78 (0.63-0.97)   | 0.023   |
|                                | 2008/9                               | 0.93 (0.73-1.19)      | 0.571   | 1.20 (0.81-1.78)   | 0.366   | 0.96 (0.78-1.19)   | 0.728   |
|                                | 2009/10                              | 0.84 (0.66-1.08)      | 0.173   | 0.99 (0.67-1.47)   | 0.967   | 0.84 (0.68-1.03)   | 0.091   |
|                                | 2010/11                              | 0.70 (0.55-0.90)      | 0.005   | 0.71 (0.47-1.07)   | 0.104   | 0.78 (0.63-0.96)   | 0.019   |
|                                | 2011/12                              | 0.73 (0.57-0.94)      | 0.013   | 0.89 (0.60-1.33)   | 0.579   | 0.86 (0.70-1.05)   | 0.136   |
|                                | 2012/13                              | 0.71 (0.56-0.91)      | 0.006   | 0.80 (0.54-1.19)   | 0.281   | 0.92 (0.75-1.13)   | 0.428   |
|                                | 2013/14                              | 0.58 (0.45-0.74)      | <0.001  | 0.71 (0.48-1.06)   | 0.094   | 0.65 (0.53-0.81)   | <0.001  |

**Repeat PTBD**

The results of the multivariate analyses of factors associated with needing a further PTBD are shown in Table 5. Subjects undergoing an additional PTBD procedure within 2 months of their initial PTBD were younger (81+ years, 0.21 (95% CI 0.16-0.27),  $p<0.001$ ), less likely to have comorbidities (20+, 0.45 (95% CI 0.29-0.70),  $p<0.001$ ) and were more likely to have cholangiocarcinoma (2.05 (95% CI 1.77-2.37),  $p<0.001$ ). Subjects undergoing their procedure in a high-volume centre performing between 84 and 180 procedures per year were much less likely to require a second procedure within 2 months (0.47 (95% CI 0.36-0.62),  $p<0.001$ ).

For peer review only

**Table 5 Multivariate regression analysis of demographic factors associated with the need for a second percutaneous transhepatic biliary drainage for unresectable malignant disease**

|                      |                                                                          | Odds Ratio         | P-value |
|----------------------|--------------------------------------------------------------------------|--------------------|---------|
| Age Group            | <61                                                                      | 1 (baseline group) |         |
|                      | 62 to 68                                                                 | 0.81 (0.68 - 0.97) | 0.026   |
|                      | 69 to 74                                                                 | 0.67 (0.56 - 0.81) | <0.001  |
|                      | 75 to 80                                                                 | 0.50 (0.41 - 0.61) | <0.001  |
|                      | 81 +                                                                     | 0.21 (0.16 - 0.27) | <0.001  |
| Sex                  | Male                                                                     | 1 (baseline group) |         |
|                      | Female                                                                   | 0.84 (0.74 - 0.96) | 0.01    |
| Comorbidity Score    | < 5                                                                      | 1 (baseline group) |         |
|                      | 5 to 10                                                                  | 0.86 (0.70 - 1.06) | 0.161   |
|                      | 10 to 15                                                                 | 0.70 (0.59 - 0.83) | <0.001  |
|                      | 15 to 20                                                                 | 0.30 (0.20 - 0.45) | <0.001  |
|                      | 20+                                                                      | 0.45 (0.29 - 0.70) | <0.001  |
| Spell Year           | 2001/02                                                                  | 1 (baseline group) |         |
|                      | 2002/03                                                                  | 1.07 (0.69 - 1.67) | 0.757   |
|                      | 2003/04                                                                  | 1.00 (0.63 - 1.57) | 0.997   |
|                      | 2004/05                                                                  | 0.94 (0.60 - 1.48) | 0.803   |
|                      | 2005/06                                                                  | 0.91 (0.58 - 1.42) | 0.664   |
|                      | 2006/07                                                                  | 1.32 (0.88 - 1.99) | 0.186   |
|                      | 2007/08                                                                  | 1.24 (0.82 - 1.86) | 0.308   |
|                      | 2008/09                                                                  | 1.52 (1.03 - 2.26) | 0.035   |
|                      | 2009/10                                                                  | 1.78 (1.22 - 2.60) | 0.003   |
|                      | 2010/11                                                                  | 1.57 (1.07 - 2.31) | 0.022   |
|                      | 2011/12                                                                  | 1.99 (1.37 - 2.90) | <0.001  |
| 2012/13              | 2.02 (1.39 - 2.94)                                                       | <0.001             |         |
| 2013/14              | 1.91 (1.31 - 2.79)                                                       | 0.001              |         |
| Deprivation score    | 1 (most deprived)                                                        | 0.78 (0.63 - 0.97) | 0.023   |
|                      | 2                                                                        | 0.97 (0.79 - 1.19) | 0.792   |
|                      | 3                                                                        | 0.94 (0.77 - 1.15) | 0.543   |
|                      | 4                                                                        | 0.99 (0.81 - 1.21) | 0.918   |
|                      | 5 (least deprived)                                                       | 1 (baseline group) |         |
| PTBD Volume per year | <=15                                                                     | 1 (baseline group) |         |
|                      | 16 to 27                                                                 | 0.72 (0.60 - 0.87) | 0.001   |
|                      | 28 to 43                                                                 | 0.40 (0.32 - 0.50) | <0.001  |
|                      | 44 to 83                                                                 | 0.55 (0.42 - 0.72) | <0.001  |
|                      | 84 to 180                                                                | 0.47 (0.36 - 0.62) | <0.001  |
| Type of Cancer       | C17 - Malignant Neoplasm of Small Intestine                              | 1.47 (1.02-2.11)   | 0.038   |
|                      | C22 - Malignant Neoplasm of Liver and Intrahepatic Bile Ducts            | 2.05 (1.77-2.37)   | <0.001  |
|                      | C23 - Malignant Neoplasm of Gallbladder                                  | 1.68 (1.23-2.31)   | 0.001   |
|                      | C24 - Malignant Neoplasm of other and unspecified parts of biliary tract | 1.12 (0.77-1.63)   | 0.55    |
|                      | C25 - Malignant Neoplasm of Pancreas                                     | 1 (baseline group) |         |

## DISCUSSION

This is the largest study to date examining the outcomes of patients undergoing PTBD for unresectable malignant biliary tract obstruction. 7-day and 30-day mortality was 5.2% and 23.1% respectively with a median survival of 92 days. Reported 30-day mortality rates following PTBD vary considerably in the literature. In a 2008 review examining PTBD case series, 30-day mortality for subjects with distal biliary obstruction varied from 2 to 20% and for hilar lesions from 9 to 20%, (2). However, 30-day mortality has been reported to be as high as 39% in other case series, (3, 12-14). In 2012, the results of a large UK audit of biliary drainage and stenting procedures was published. This showed an in-hospital mortality of 19.8% in those with malignant biliary obstruction, (15).

Surgical or endoscopic drainage of the biliary system was not examined in the present study. Surgical drainage is associated with higher postoperative mortality and morbidity and an increased length of stay compared to non-surgical intervention, (16-19). The choice between endoscopic or percutaneous biliary drainage is less clear, as few randomized trials exist, (20). The decision often depends on the level of biliary obstruction. In England, PTBD is often the preferred technique for lesions above the common hepatic duct and when ERCP has failed, (8, 21). Endoscopic drainage, if technically possible, is probably perceived to be safer due to a small, very old, prospective randomized trial from 1987 in hilar and distal bile duct obstruction comparing the two techniques. The endoscopic approach had a higher success rate (81% vs. 61%,  $p=0.017$ ) and a lower 30-day mortality (15% vs. 33%,  $p=0.016$ ), (22). However, only plastic stents were used in this study, which does not reflect current practice. There is only one randomized trial comparing PTBD with ERCP in hilar biliary obstruction due to gallbladder cancer, (3). This demonstrated that PTBD had a higher success rate than ERCP (89% vs. 41%,  $p < 0.001$ ) and a lower rate of early cholangitis (11% vs. 48%,  $p = 0.02$ ). In a recent meta-analysis comparing PTBD with ERCP for the relief of malignant jaundice, subjects undergoing PTBD were less likely to develop cholangitis compared to ERCP (0.55 (95% CI 0.36-0.84),  $p=0.006$ ). However, there was no difference in success rate or 30-day mortality between the two approaches, (23).

The regression analysis in the present study identified subjects with an increased risk of death post PTBD. Older males, with increasing deprivation and comorbidity (especially pre-existing renal dysfunction), and those with a cancer type other than pancreatic had a worse prognosis. A reduced mortality in providers performing a higher volume of PTBDs each year was identified. The authors would therefore recommend that PTBD outcomes are audited and practices from high volume centres with good outcomes adopted.

1  
2  
3  
4  
5 Biliary obstruction in malignancy may result in pruritus, pain, cholangitis and liver  
6 failure, (1, 2). The goal of biliary drainage in inoperable patients is to improve  
7 quality of life and, in those with a good performance status, allow palliative  
8 chemotherapy. Two studies have shown that biliary drainage can improve quality of  
9 life, (3, 4) and it has been shown that gemcitabine-based combinations improve  
10 progression free survival in pancreatic cancer (HR 0.91 (95% CI 0.42-1.31), (5). A  
11 combination of gemcitabine and cisplatin can improve median survival in advanced  
12 biliary tract cancer from 8.1 to 11.7 months (HR 0.64 (95% CI 0.52 - 0.80),  $p < 0.001$ ),  
13 (6, 7). However, in our study, it is important to recognise that when considering  
14 PTBD, most subjects did not receive chemotherapy after their procedure, with the  
15 rates decreasing significantly with age (aged <40 years (40.7% chemotherapy), aged  
16 70 to 80 (17.4%), aged over 80 (2.5%)).

17  
18  
19  
20  
21  
22  
23 The rate of coded post-procedural complications in our study was high. 5.9% of  
24 subjects were coded as experiencing a serious complication within 7 days, and  
25 20.2% within 3 months. However, it was not possible to clarify the relationship  
26 between these later complications and the procedure or the underlying  
27 malignancy. Complication rates after PTBD vary between case series from 7 to 30%,  
28 (2), but cholangitis was common with rates of between 9 and 11% reported, (3, 12-  
29 14). The UK audit reported a minor complication rate of 26% and a major  
30 complication rate of 7.9%, including a 3.5% rate of sepsis, (15). It has therefore  
31 been recommended that all patients undergoing percutaneous drainage receive  
32 prophylactic antibiotics prior to their procedure, (24-27). However, there are no  
33 national or international guidelines to date on this issue. Rates of cholangitis in  
34 these studies were higher in subjects with a low serum albumin or raised CRP,  
35 those with proximal or multiple points of intrahepatic biliary obstruction, neoplastic  
36 invasion or compression of the duodenum and if *Staphylococcus aureus* was  
37 present at the site of skin puncture. With these factors in mind, patients should be  
38 monitored closely post-PTBD for early signs of sepsis, and infection treated  
39 aggressively with intravenous antibiotics and fluids. Stent occlusion due to the  
40 deposition of a bacterial biofilm and biliary sludge or tumour overgrowth is an  
41 important late complication, (28). In the present study, stent blockage or  
42 displacement was coded in 6.2% of subjects and rates in other series have been  
43 reported at between 5 and 27%, (2, 29, 16). 13.5% of subjects in the current study  
44 underwent more than one PTBD procedure. A 2008 review of PTBD series reported  
45 recurrence of obstructive jaundice in between 5 and 25% of subjects, with the  
46 majority undergoing a repeat PTBD, (2).

47  
48  
49  
50  
51  
52  
53  
54  
55  
56  
57  
58 Every healthcare provider in England is required to submit diagnostic and  
59 procedural data to HES. However, the accuracy of the coding data submitted is a  
60

1  
2  
3 potential concern as it depends on the quality of the medical records and on the  
4 staff coding the records. HES produces a yearly report on the quality of the data  
5 received. In the 2012/2013 report, 99.3% of primary diagnoses and 99.9% of  
6 primary procedure codes were accurate, (30). In order to validate the accuracy of  
7 diagnostic and procedural coding relevant to the present study, the number of  
8 PTBDs meeting the study criteria at UHB between 2009 and 2014 was compared to  
9 the number submitted to HES. 321 subjects were recorded in HES as undergoing  
10 PTBD at UHB and 305 patients were identified from examining local radiology data,  
11 giving an accuracy of 95%. HES data is unfortunately not linked to cancer registry  
12 data, due to restrictions under which the data is held. Subjects were therefore  
13 excluded who had very long periods following an apparent diagnosis of malignancy  
14 and PTBD and those with long delays in cancer diagnosis following PTBD. There are  
15 some important aspects of the patient's care that are not recorded in HES.  
16 Information regarding the exact location of the lesion and whether the procedure  
17 was performed with ultrasound guidance, by a supervised trainee, or by an  
18 experienced interventional radiologist was not available. Important data such as  
19 whether any technical difficulties were encountered, performance status, bilirubin  
20 and albumin levels, clotting profile or inflammatory markers were also not  
21 available. In particular, prescription data regarding antibiotic use is not recorded,  
22 which limits our ability to investigate further the high frequency of septic  
23 complications. Recording of chemotherapy in HES may also not be entirely  
24 complete, (30).  
25  
26  
27  
28  
29  
30  
31  
32  
33  
34

35 In conclusion, 30-day mortality in subjects undergoing PTBD for relief of  
36 unresectable malignant biliary obstruction was high at 23.1%. Older males and  
37 those with increasing comorbidity (especially pre-existing renal dysfunction) and  
38 deprivation have a poorer prognosis. Subjects undergoing a PTBD in a provider that  
39 performs more than 28 procedures per year have a significantly lower risk of death  
40 and there is a large variation in outcomes between providers. In light of the high  
41 mortality found in this study, the authors strongly recommend that patients  
42 undergo careful multi-disciplinary discussion prior to PTBD in order to identify risk  
43 factors for a poor outcome, to treat renal dysfunction and sepsis early, and to  
44 confirm that the patient is likely to benefit from PTBD, in terms of either symptom  
45 relief or as a bridge to chemotherapy.  
46  
47  
48  
49  
50  
51

## 52 53 **Acknowledgements**

54  
55  
56 The authors would like to acknowledge the contribution of Mr. Keith Roberts,  
57 consultant hepato-biliary surgeon at University Hospital Birmingham, with  
58 identifying relevant surgical procedures.  
59  
60

### Author contributions:

**James Rees:** First author, study concept and design, data interpretation, drafting of manuscript

**Jemma Mytton:** Acquisition of data, data analysis

**Felicity Evison:** Acquisition of data, data analysis

**Kamarjit Singh Mangat:** Study concept and design, critical revision of manuscript for important intellectual content

**Prashant Patel:** Study concept and design, data interpretation, critical revision of manuscript for important intellectual content

**Nigel Trudgill:** Senior author, study concept and design, data interpretation, drafting of manuscript, study supervision

### Funding:

This research received no specific grant from any funding agency in the public, commercial or not-for-profit sectors

### Conflict of interests:

Kamarjit Singh Mangat is the inventor of a biliary biopsy forceps kit that was first licensed in 2013. The rights have been transferred to Cook Medical and he receives minimal royalties for sales of this device.

### Data Availability Statement:

All data relevant to the study are included in the article or uploaded as supplementary information

### Figure 1 Study Flowchart

### Figure 2 Kaplan Meier unadjusted analysis of 30-day mortality following percutaneous transhepatic biliary drainage for unresectable malignant disease by age

### References

1. Chu D, Adler DG. Malignant biliary tract obstruction: evaluation and therapy. *J Natl Compr Cancer Netw* 2010;8:1033–44.
2. Van Delden OM, Laméris JS. Percutaneous drainage and stenting for palliation of malignant bile duct obstruction. *Eur Radiol* 2008;18:448–56.

3. Saluja SS, Gulati M, Garg PK, et al. Endoscopic or percutaneous biliary drainage for gallbladder cancer: a randomized trial and quality of life assessment. *Clin Gastroenterol Hepatol* 2008;6:944–950.
4. Barkay O, Mosler P, Schmitt CM, et al. Effect of endoscopic stenting of malignant bile duct obstruction on quality of life. *J Clin Gastroenterol* 2013;47:526–31.
5. Sultana A, Smith CT, Cunningham D, et al. Meta-analyses of chemotherapy for locally advanced and metastatic pancreatic cancer. *J Clin Oncol* 2007;25:2607–15.
6. Valle J, Wasan H, Palmer DH, et al. Cisplatin plus gemcitabine versus gemcitabine for biliary tract cancer. *N Engl J Med* 2010;362: 1273–81.
7. Valle JW, Wasan H, Johnson P, et al. Gemcitabine alone or in combination with cisplatin in patients with advanced or metastatic cholangiocarcinomas or other biliary tract tumours: a multicentre randomised phase II study - The UK ABC-01 Study. *Br J Cancer* 2009;101:621–7.
8. Silva MA, Tekin K, Aytekin F, et al. Surgery for hilar cholangiocarcinoma; a 10 year experience of a tertiary referral centre in the UK. *Eur J Surg Oncol* 2005;31:533–9.
9. Health and Social Care Information Centre. Hospital Episode Statistics; [www.hscic.gov.uk/hes](http://www.hscic.gov.uk/hes) (Accessed June 2018).
10. Nuttall M, van der Meulen J, Emberton M. Charlson scores based on ICD-10 administrative data were valid in assessing comorbidity in patients undergoing urological cancer surgery. *J Clin Epidemiol* 2006;59:265–73.
11. Office for National Statistics. Index of Multiple Deprivation (IMD) 2007. [https://data.gov.uk/dataset/index\\_of\\_multiple\\_deprivation\\_imd\\_2007](https://data.gov.uk/dataset/index_of_multiple_deprivation_imd_2007) (Accessed June 2018)
12. Stoker J, Laméris JS, van Blankenstein M. Percutaneous metallic self-expandable endoprostheses in malignant hilar biliary obstruction. *Gastrointest Endosc* 1993;39:43–9.
13. Inal M, Akgül E, Aksungur E, et al. Percutaneous placement of biliary metallic stents in patients with malignant hilar obstruction: unilobar versus bilobar drainage. *J Vasc Interv Radiol* 2003;14:1409–16.
14. Schima W, Prokesch R, Osterreicher C, et al. Biliary Wallstent endoprosthesis in malignant hilar obstruction: long-term results with regard to the type of obstruction. *Clin Radiol* 1997;52:213–9.
15. Uberoi R, Das N, Moss J, et al. British Society of Interventional Radiology: biliary drainage and stenting registry (BDSR). *Cardiovascular and interventional radiology*. 2012;1;35(1):127-38.
16. Smith AC, Dowsett JF, Russell RC, et al. Randomised trial of endoscopic stenting versus surgical bypass in malignant low bile duct obstruction. *Lancet* 1994;344:1655–60.



17. Andersen JR, Sørensen SM, Kruse A, et al. Randomised trial of endoscopic endoprosthesis versus operative bypass in malignant obstructive jaundice. *Gut* 1989;30:1132–5.
18. Hyöty MK, Nordback IH. Biliary stent or surgical bypass in unresectable pancreatic cancer with obstructive jaundice. *Acta Chir Scand* 1990;156:391–6.
19. Shepherd HA, Royle G, Ross AP, et al. Endoscopic biliary endoprosthesis in the palliation of malignant obstruction of the distal common bile duct: a randomized trial. *Br J Surg* 1988;75:1166–8.
20. Ho CS, Warkentin AE. Evidence-based decompression in malignant biliary obstruction. *Korean J Radiol* 2012;13(Suppl 1):S56-61.
21. Hatzidakis A, Adam A. The interventional radiological management of cholangiocarcinoma. *Clin Radiol* 2003;58:91–6.
22. Speer AG, Christopher R, Russell G, et al. Randomised trial of endoscopic versus percutaneous stent insertion in malignant obstructive jaundice. *Lancet* 1987;2:57–62.
23. Zhao XQ, Dong JH, Jiang K, et al. Comparison of percutaneous transhepatic biliary drainage and endoscopic biliary drainage in the management of malignant biliary tract obstruction: a meta-analysis. *Dig Endosc* 2015;27:137–45.
24. Saad WE, Wallace MJ, Wojak JC, et al. Quality improvement guidelines for percutaneous transhepatic cholangiography, biliary drainage, and percutaneous cholecystostomy. *J Vasc Interv Radiol* 2010;21:789–95.
25. Audisio RA, Bozzetti F, Severini A, et al. The occurrence of cholangitis after percutaneous biliary drainage: evaluation of some risk factors. *Surgery* 1988;103:507–12.
26. Nomura T, Shirai Y, Hatakeyama K. Bacteribilia and cholangitis after percutaneous transhepatic biliary drainage for malignant biliary obstruction. *Dig Dis Sci* 1999;44:542–6.
27. Ahn S, Lee YS, Lim KS, et al. Malignant biliary obstructions: can we predict immediate postprocedural cholangitis after percutaneous biliary drainage? *Support Care Cancer* 2013;21: 2321–6.
28. Leung JW, Ling TK, Kung JL, et al. The role of bacteria in the blockage of biliary stents. *Gastrointest Endosc* 1988;34:19–22.
29. Stoker J, Laméris JS, Jeekel J. Percutaneously placed Wallstent endoprosthesis in patients with malignant distal biliary obstruction. *Br J Surg* 1993;80:1185–7.
30. Health and Social Care Information Centre. The Quality of Nationally Submitted Health and Social Care Data England, Annual Report, 2013, Experimental Statistics (Accessed July 2019).

1  
2  
3 [https://files.digital.nhs.uk/publicationimport/pub11xxx/pub11530/second-](https://files.digital.nhs.uk/publicationimport/pub11xxx/pub11530/second-annu-data-qual-rep-2013.pdf)  
4 [annu-data-qual-rep-2013.pdf](https://files.digital.nhs.uk/publicationimport/pub11xxx/pub11530/second-annu-data-qual-rep-2013.pdf)  
5  
6  
7  
8  
9  
10  
11  
12  
13  
14  
15  
16  
17  
18  
19  
20  
21  
22  
23  
24  
25  
26  
27  
28  
29  
30  
31  
32  
33  
34  
35  
36  
37  
38  
39  
40  
41  
42  
43  
44  
45  
46  
47  
48  
49  
50  
51  
52  
53  
54  
55  
56  
57  
58  
59  
60

For peer review only

1  
2  
3  
4  
5  
6  
7  
8  
9  
10  
11  
12  
13  
14  
15  
16  
17  
18  
19  
20  
21  
22  
23  
24  
25  
26  
27  
28  
29  
30  
31  
32  
33  
34  
35  
36  
37  
38  
39  
40  
41  
42  
43  
44  
45  
46  
47  
48  
49  
50  
51  
52  
53  
54  
55  
56  
57  
58  
59  
60

**Figure 1 Study Flowchart**

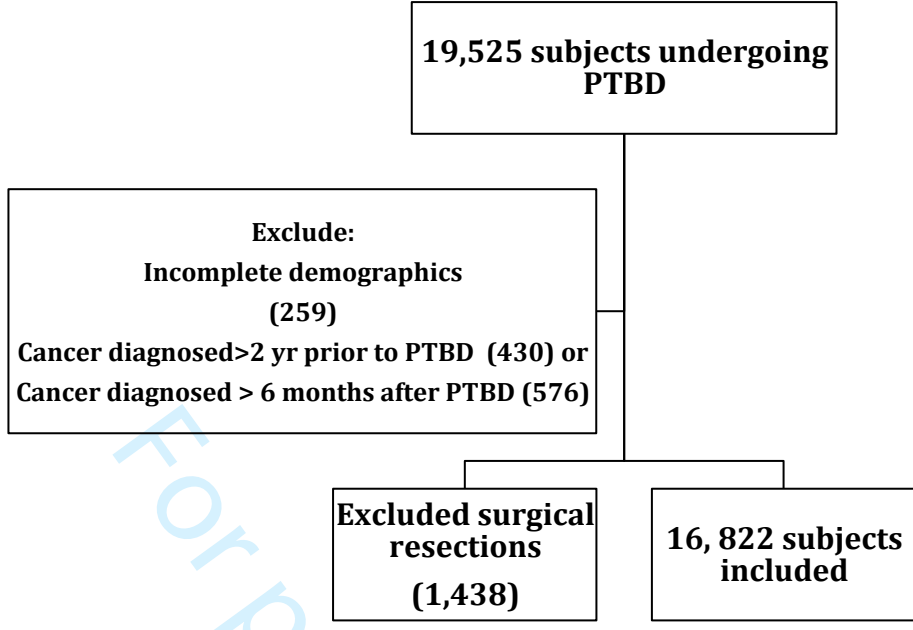

Figure 2 Kaplan Meier unadjusted analysis of 30-day mortality following percutaneous transhepatic biliary drainage for unresectable malignant disease by age

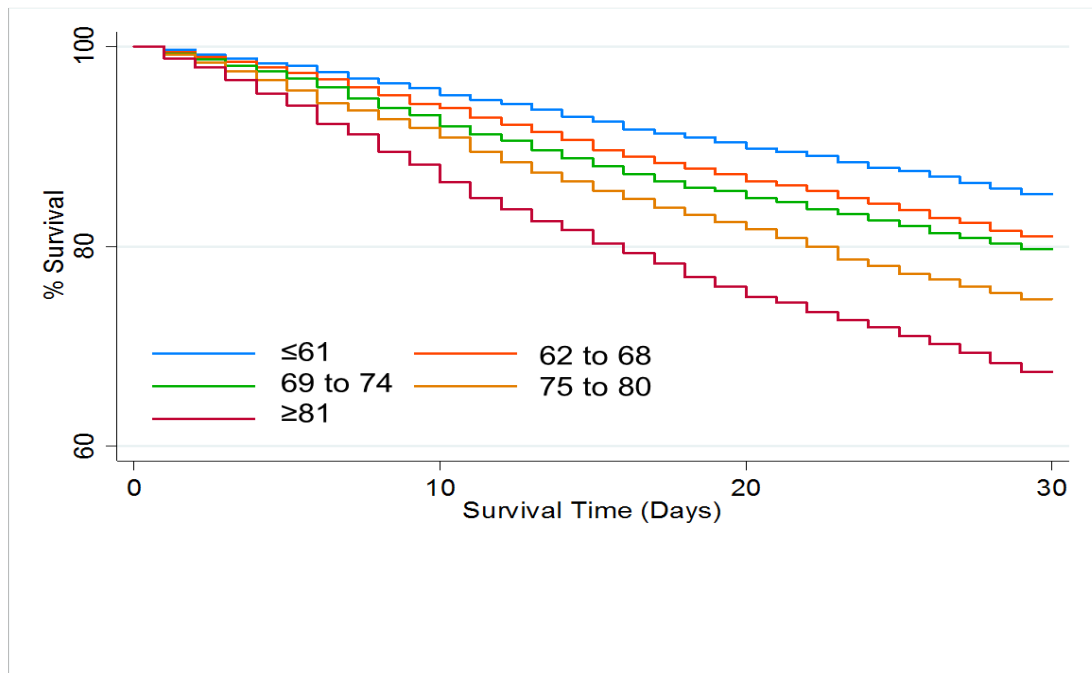

review only

**STROBE 2007 (v4) Statement—Checklist of items that should be included in reports of *cohort studies***

| Section/Topic                | Item # | Recommendation                                                                                                                                                                       | Reported on page # |
|------------------------------|--------|--------------------------------------------------------------------------------------------------------------------------------------------------------------------------------------|--------------------|
| <b>Title and abstract</b>    | 1      | (a) Indicate the study's design with a commonly used term in the title or the abstract                                                                                               | 1                  |
|                              |        | (b) Provide in the abstract an informative and balanced summary of what was done and what was found                                                                                  | 2                  |
| <b>Introduction</b>          |        |                                                                                                                                                                                      |                    |
| Background/rationale         | 2      | Explain the scientific background and rationale for the investigation being reported                                                                                                 | 4                  |
| Objectives                   | 3      | State specific objectives, including any prespecified hypotheses                                                                                                                     | 4                  |
| <b>Methods</b>               |        |                                                                                                                                                                                      |                    |
| Study design                 | 4      | Present key elements of study design early in the paper                                                                                                                              | 5-7                |
| Setting                      | 5      | Describe the setting, locations, and relevant dates, including periods of recruitment, exposure, follow-up, and data collection                                                      | 5                  |
| Participants                 | 6      | (a) Give the eligibility criteria, and the sources and methods of selection of participants. Describe methods of follow-up                                                           | 5                  |
|                              |        | (b) For matched studies, give matching criteria and number of exposed and unexposed                                                                                                  | N/A                |
| Variables                    | 7      | Clearly define all outcomes, exposures, predictors, potential confounders, and effect modifiers. Give diagnostic criteria, if applicable                                             | 6                  |
| Data sources/<br>measurement | 8*     | For each variable of interest, give sources of data and details of methods of assessment (measurement). Describe comparability of assessment methods if there is more than one group | 6-7                |
| Bias                         | 9      | Describe any efforts to address potential sources of bias                                                                                                                            | 5, 6               |
| Study size                   | 10     | Explain how the study size was arrived at                                                                                                                                            | 5                  |
| Quantitative variables       | 11     | Explain how quantitative variables were handled in the analyses. If applicable, describe which groupings were chosen and why                                                         | 6-7                |
| Statistical methods          | 12     | (a) Describe all statistical methods, including those used to control for confounding                                                                                                | 5-7                |
|                              |        | (b) Describe any methods used to examine subgroups and interactions                                                                                                                  | 5-7                |
|                              |        | (c) Explain how missing data were addressed                                                                                                                                          | 5                  |
|                              |        | (d) If applicable, explain how loss to follow-up was addressed                                                                                                                       | N/A                |
|                              |        | (e) Describe any sensitivity analyses                                                                                                                                                | 6-7                |
| <b>Results</b>               |        |                                                                                                                                                                                      |                    |

|                          |     |                                                                                                                                                                                                              |       |
|--------------------------|-----|--------------------------------------------------------------------------------------------------------------------------------------------------------------------------------------------------------------|-------|
| Participants             | 13* | (a) Report numbers of individuals at each stage of study—eg numbers potentially eligible, examined for eligibility, confirmed eligible, included in the study, completing follow-up, and analysed            | 8     |
|                          |     | (b) Give reasons for non-participation at each stage                                                                                                                                                         | 8     |
|                          |     | (c) Consider use of a flow diagram                                                                                                                                                                           | 8     |
| Descriptive data         | 14* | (a) Give characteristics of study participants (eg demographic, clinical, social) and information on exposures and potential confounders                                                                     | 8     |
|                          |     | (b) Indicate number of participants with missing data for each variable of interest                                                                                                                          | 8     |
|                          |     | (c) Summarise follow-up time (eg, average and total amount)                                                                                                                                                  | 8     |
| Outcome data             | 15* | Report numbers of outcome events or summary measures over time                                                                                                                                               | 8-10  |
| Main results             | 16  | (a) Give unadjusted estimates and, if applicable, confounder-adjusted estimates and their precision (eg, 95% confidence interval). Make clear which confounders were adjusted for and why they were included | 8-10  |
|                          |     | (b) Report category boundaries when continuous variables were categorized                                                                                                                                    | 8-10  |
|                          |     | (c) If relevant, consider translating estimates of relative risk into absolute risk for a meaningful time period                                                                                             | N/A   |
| Other analyses           | 17  | Report other analyses done—eg analyses of subgroups and interactions, and sensitivity analyses                                                                                                               | 8-10  |
| <b>Discussion</b>        |     |                                                                                                                                                                                                              |       |
| Key results              | 18  | Summarise key results with reference to study objectives                                                                                                                                                     | 11-13 |
| <b>Limitations</b>       |     |                                                                                                                                                                                                              | 13    |
| Interpretation           | 20  | Give a cautious overall interpretation of results considering objectives, limitations, multiplicity of analyses, results from similar studies, and other relevant evidence                                   | 11-13 |
| Generalisability         | 21  | Discuss the generalisability (external validity) of the study results                                                                                                                                        | 11    |
| <b>Other information</b> |     |                                                                                                                                                                                                              |       |
| Funding                  | 22  | Give the source of funding and the role of the funders for the present study and, if applicable, for the original study on which the present article is based                                                | N/A   |

\*Give information separately for cases and controls in case-control studies and, if applicable, for exposed and unexposed groups in cohort and cross-sectional studies.

**Note:** An Explanation and Elaboration article discusses each checklist item and gives methodological background and published examples of transparent reporting. The STROBE checklist is best used in conjunction with this article (freely available on the Web sites of PLoS Medicine at <http://www.plosmedicine.org/>, Annals of Internal Medicine at <http://www.annals.org/>, and Epidemiology at <http://www.epidem.com/>). Information on the STROBE Initiative is available at [www.strobe-statement.org](http://www.strobe-statement.org).

# BMJ Open

**The outcomes of biliary drainage by percutaneous transhepatic cholangiography for the palliation of malignant biliary obstruction in England between 2001 and 2014; a retrospective cohort study**

|                                 |                                                                                                                                                                                                                                                                                                                                                                                                                                                                                                                                                               |
|---------------------------------|---------------------------------------------------------------------------------------------------------------------------------------------------------------------------------------------------------------------------------------------------------------------------------------------------------------------------------------------------------------------------------------------------------------------------------------------------------------------------------------------------------------------------------------------------------------|
| Journal:                        | <i>BMJ Open</i>                                                                                                                                                                                                                                                                                                                                                                                                                                                                                                                                               |
| Manuscript ID                   | bmjopen-2019-033576.R1                                                                                                                                                                                                                                                                                                                                                                                                                                                                                                                                        |
| Article Type:                   | Original research                                                                                                                                                                                                                                                                                                                                                                                                                                                                                                                                             |
| Date Submitted by the Author:   | 17-Oct-2019                                                                                                                                                                                                                                                                                                                                                                                                                                                                                                                                                   |
| Complete List of Authors:       | Rees, James; Dudley Group of Hospitals NHS Trust, Gastroenterology Mytton, Jemma; University Hospitals Birmingham , Evison, Felicity; University Hospitals Birmingham NHS Foundation Trust, Department of Health Informatics Mangat, Kamarjit; National University Hospital, Department of Diagnostic Imaging; University Hospitals Birmingham , Department of Radiology Patel, Prashant; University of Birmingham, Institute of Cancer and Genomic Science Trudgill, Nigel; Sandwell and West Birmingham Hospitals NHS Trust, Department of Gastroenterology |
| <b>Primary Subject Heading</b>: | Gastroenterology and hepatology                                                                                                                                                                                                                                                                                                                                                                                                                                                                                                                               |
| Secondary Subject Heading:      | Radiology and imaging                                                                                                                                                                                                                                                                                                                                                                                                                                                                                                                                         |
| Keywords:                       | Gastrointestinal tumours < GASTROENTEROLOGY, Hepatobiliary tumours < ONCOLOGY, Adult palliative care < PALLIATIVE CARE, Interventional radiology < RADIOLOGY & IMAGING                                                                                                                                                                                                                                                                                                                                                                                        |
|                                 |                                                                                                                                                                                                                                                                                                                                                                                                                                                                                                                                                               |

SCHOLARONE™  
Manuscripts

1  
2  
3  
4  
5  
6 **The outcomes of biliary drainage by percutaneous transhepatic cholangiography**  
7 **for the palliation of malignant biliary obstruction in England between 2001 and**  
8 **2014; a retrospective cohort study**  
9

10 **J. Rees<sup>1</sup>, J. Mytton<sup>2</sup>, F. Evison<sup>2</sup>, K. Mangat<sup>3, 4</sup>, P. Patel<sup>5</sup>, N. Trudgill<sup>6</sup>**  
11

12  
13 1 Department of Gastroenterology, Russells Hall Hospital, Pensnett Road, Dudley,  
14 West Midlands, United Kingdom, DY1 2HQ

15 2 University Hospital Birmingham NHS Foundation Trust, Health Informatics  
16 Birmingham, Birmingham, UK

17 3 Department of Diagnostic Imaging, National University Hospital, 5 Lower Kent  
18 Ridge Road, Singapore, 119074

19 4 Department of Radiology, University Hospital Birmingham NHS Foundation Trust,  
20 Mindelsohn Way, Edgbaston, Birmingham, United Kingdom, B152TH

21 5 University of Birmingham, Institute of Cancer and Genomic Science, Edgbaston,  
22 Birmingham, United Kingdom, B152TT

23 6 Department of Gastroenterology, Sandwell General Hospital, Lyndon, West  
24 Bromwich, Birmingham, United Kingdom, B714HJ  
25  
26  
27  
28  
29  
30  
31  
32  
33  
34

35 Word count: 3,777 (excluding abstract and references, statements, figures and  
36 tables)  
37  
38  
39  
40  
41  
42  
43  
44  
45

46 Corresponding author:

47 Dr. Nigel Trudgill

48 Department of Gastroenterology

49 Sandwell General Hospital,

50 Lyndon,

51 West Bromwich,

52 United Kingdom, B71 4HJ

53 Tel: 01215072577

54 Email [nigel.trudgill@nhs.net](mailto:nigel.trudgill@nhs.net)  
55  
56  
57  
58  
59  
60



## ABSTRACT

### Introduction

Relieving obstructive jaundice in inoperable pancreato-biliary cancers improves quality of life and permits chemotherapy. Percutaneous transhepatic cholangiography (PTC) with drainage and/or stenting relieves jaundice but can be associated with significant morbidity and mortality. Percutaneous transhepatic biliary drainage (PTBD) in malignant biliary obstruction was therefore examined in a national cohort to establish risk factors for poor outcomes.

### Method

Retrospective study of adult patients undergoing PTBD for palliation of pancreato-biliary cancer in England between 2001 and 2014, identified from Hospital Episode Statistics (HES). Multivariate logistic regression analysis was used to examine associations with mortality and the need for a repeat PTBD within 2 months.

### Results

16,822 patients analysed (median age 72 (range 19-104) years, 50.3% male). 58% pancreatic and 30% biliary tract cancer. In-hospital and 30-day mortality were 15.3 (95% CI 14.7 - 15.9)% and 23.1 (22.4 - 23.8)% respectively. 20.2% suffered a coded complication within 3 months. Factors associated with 30-day mortality: age ( $\geq 81$  years odds ratio 2.68 (95% CI 2.37-3.03),  $p < 0.001$ ), increasing comorbidity (Charlson score 20+, 3.10 (2.64-3.65)),  $p < 0.001$ ), pre-existing renal dysfunction (2.37 (2.12-2.65),  $p < 0.001$ ) and non-pancreatic cancer (unspecified biliary tract 1.28 (1.08-1.52),  $p = 0.004$ ). Females had lower mortality (0.91 (0.84-0.98),  $p = 0.011$ ), as did patients undergoing PTBD in a 'higher volume' provider (84-180 PTBDs per year 0.68 (0.58-0.79),  $p < 0.001$ ).

### Conclusion

In patients undergoing PTBD for the palliation of malignant biliary obstruction, 30-day mortality was high at 23.1%. Mortality was higher in older patients, males, those with increasing comorbidity, a cancer site other than pancreas and at 'lower-volume' PTBD providers.

**Abstract word count: 249**

**Keywords: Gastrointestinal tumours, hepatobiliary tumours, adult palliative care, interventional radiology**

**STRENGTHS AND LIMITATIONS OF THIS STUDY**

- This is the largest study to date examining the outcomes of patients undergoing PTBD for unresectable biliary tract obstruction.
- Use of HES database ensures high quality diagnostic, procedural and mortality data at a national level.
- Diagnostic and procedural coding relevant to study locally validated, confirming a high level of accuracy.
- Accuracy of HES database dependent on quality of medical records and the staff coding the records.
- Information relevant to use of PTBD not recorded in HES includes pathology results, use of antibiotics, technical details of PTBD and seniority/experience of radiologist performing procedure.

## INTRODUCTION

Jaundice may arise from biliary obstruction by cholangiocarcinoma, pancreatic, duodenal, gallbladder or primary or secondary liver malignancies. The majority of such patients present at a late stage and are unsuitable for curative surgery. Biliary obstruction may impair quality of life and result in pruritus, cholangitis and liver failure, (1,2). In patients who are unsuitable for curative resection, relief of obstructive jaundice improves quality of life, (3,4). Furthermore, biliary drainage can be a bridge to palliative chemotherapy, improving survival in locally advanced and metastatic pancreatic cancer, (5) and in advanced biliary tract cancer, (6,7).

Biliary drainage can be achieved surgically, via endoscopic retrograde cholangiopancreatography (ERCP) or via percutaneous transhepatic cholangiography (PTC). The approach employed will depend on whether the cancer is operable and its location. PTC facilitates external and internal biliary tree drainage and is the primary method of relieving biliary obstruction for malignant lesions above the level of the common hepatic duct, (8) or when ERCP has failed to relieve more distal obstruction. However, percutaneous transhepatic biliary drainage (PTBD) is associated with significant mortality and morbidity, with complications reported to be as high as 30%, including cholangitis, sepsis, haemorrhage and stent blockage, (2).

Case series and randomized controlled trials examining outcomes of PTBD in malignancy have typically involved less than 100 patients. National data were therefore used to examine unselected outcomes for PTBD in a very large cohort of inoperable pancreato-biliary cancer to establish factors associated with poor outcomes, such as early mortality.

## **METHODS**

### **Data source**

Hospital Episode Statistics (HES) is an administrative database that records all elective and emergency care episodes in English National Health Service hospitals. A unique identifier allows individuals to be followed through their hospital admissions and outpatient attendances. Each recorded episode contains diagnostic, procedural, demographic, administrative and geographical information. Diagnostic data is coded using the International Classification of Diseases version 10 (ICD-10) and procedures coded using the Office of Population Censuses and Surveys Classification of Interventions and Procedures 4<sup>th</sup> revision (OPCS-4). HES is linked to the Office of National Statistics (ONS) mortality data, providing information on date and cause of death, (9).

### **Study population**

#### **Inclusion criteria**

All patients aged over 18 years undergoing PTBD between 2001 and 2014 with a diagnosis of cancer of the pancreas, gallbladder, liver, intrahepatic bile ducts, small bowel or unspecified bile duct cancer were included. PTBD and diagnosis data was identified by OPCS-4 and ICD-10 coding respectively. All analyses relate to the first PTBD each patient underwent.

#### **Exclusion criteria**

Patients were excluded if they were diagnosed with cancer more than two years prior to their first PTBD or more than 6 months after their first procedure in order to exclude patients with potentially incorrectly coded diagnoses and to allow for delays in coding of a cancer diagnosis. Patients who went on to have a surgical resection of their malignancy after PTBD were identified by OPCS-4 coding and were excluded, as were those with incomplete demographic data.

### **Patient and Public involvement**

This research was carried out without patient or public involvement.

### **Validation of PTBD population**

To assess the validity of the PTBD population, the number of PTBDs undertaken at University Hospital Birmingham (UHB) between April 2009 and April 2014 that met the study criteria were extracted from the UHB radiology database and compared to the number of PTBDs coded in HES at UHB for the same period.

## **Study variables and data extraction**

### **Demographics**

Demographic data including age, gender and ethnicity were extracted from coding at the time of PTBD. Age was divided into quintiles. Ethnicity was classified into White, Asian or Asian British, Black or Black British, Mixed, any other ethnic group and unknown.

### **Comorbidity**

The Charlson co-morbidity index was calculated using ICD-10 codes for secondary diagnoses, excluding any form of cancer, and divided into five categories by number of comorbidities. The derivation of Charlson score from ICD-10 coding in HES has previously been assessed and found to be valid for assessing comorbidity in patients undergoing surgery for urological cancer. There was an 83% agreement between Charlson scores derived from ICD-10 coding in HES and those derived from ICD-9 comorbidity codes, (10).

### **Socio-economic status**

Deprivation was assessed using the Index of Multiple Deprivations 2007, which is calculated from an aggregate score for each English Lower Layer Super Output Area (LSOA), based on income, employment, health, education, training and skills, barriers to housing and services, crime and living environment, (11). Patients' LSOAs are recorded in HES based on postcode of residence and deprivation was analysed in quintiles, with 1 being the most and 5 the least deprived.

### **Healthcare provider**

Healthcare providers were stratified by their PTBD volume per year into quintiles.

### **ERCP**

Patients who had undergone an ERCP prior to their PTBD were identified by OPCS-4 coding.

## Outcomes

Outcomes were calculated from the date of the first PTBD and included in-hospital, 7 and 30-day mortality and median survival. Emergency readmissions into any hospital within 30 days of discharge post-PTBD were also identified. The proportion of patients that suffered complications related to PTBD were identified using ICD-10 coding. Patients undergoing chemotherapy after their PTBD were identified by ICD-10 (Z080, Z511, Z542, Z926) and OPCS 4 codes (X70, X71, X72, X73, X352, X384).

## Ethics

HES includes only pseudonymised data and therefore ethical approval is not necessary. It is available under a data sharing agreement for the purposes of service evaluation.

## Statistical analysis

All statistical analyses were carried out using STATA SE v14 (College Station Tx: StataCorp LP). Univariate analyses were performed to compare characteristics of included and excluded patients, as well as factors affecting the rates of chemotherapy (Tables 1 and 2 respectively), using  $\chi^2$  tests for categorical variables. Bonferroni correction was applied to these analyses and results were considered statistically significant if p-values were  $<0.0045$ . A multivariate model was produced to examine associations with mortality following adjustment for the variables identified on univariate analyses. A further multivariate model was produced to examine associations with needing a further PTBD procedure, adjusting for the list of variables identified on Univariate analysis. In the multivariate analyses p-values of  $<0.05$  were considered statistically significant. Odds ratios, 95% confidence intervals and p values were generated from the multivariate model. Unadjusted Kaplan Meier analysis was undertaken for 7-day and 30-day mortality, split by age quintile.

## RESULTS

### Study population

Between 2001 and 2014, 19,525 patients underwent PTBD for one of the study malignancies. 1,006 patients were diagnosed with cancer more than two years before or more than 6 months after their PTBD and were excluded. A further 1,438 patients who underwent potentially curative resection after their PTBD and 259 patients with incomplete demographic data were also excluded, giving a final study population of 16,822 (*Figure 1*).

### Patient characteristics

The characteristics of the study population and excluded patients are shown in table 1. 50.3% of patients were male and the median age was 72 (range 19 to 104) years. 58% of patients had pancreatic cancer, with malignant neoplasm of the liver and intrahepatic bile ducts accounting for 30.1% of patients, of whom 90.4% had a diagnosis of cholangiocarcinoma. 86.3% of patients underwent only one procedure, with a range from one to fifteen and 61.8% had undergone a previous ERCP. 57.9% of patients undergoing prior ERCP had their PTBD carried out on the same admission, indicating that the PTBD was likely a salvage procedure.

**Table 1 Study and excluded patient characteristics**

|                        |                                                                          | Included patients | Excluded patients | p-value |
|------------------------|--------------------------------------------------------------------------|-------------------|-------------------|---------|
| Sex                    | Male                                                                     | 8465 (50.3%)      | 527 (52.4%)       | 0.203   |
|                        | Female                                                                   | 8357 (49.7%)      | 479 (47.6%)       |         |
| Age                    | < 61                                                                     | 3267 (19.4%)      | 237 (23.6%)       | 0.005   |
|                        | 62 to 68                                                                 | 3082 (18.3%)      | 173 (17.2%)       |         |
|                        | 69 to 74                                                                 | 3253 (19.3%)      | 179 (17.8%)       |         |
|                        | 75 to 80                                                                 | 3412 (20.3%)      | 219 (21.8%)       |         |
|                        | ≥81                                                                      | 3808 (22.6%)      | 198 (19.7%)       |         |
| Deprivation            | 1                                                                        | 3258 (19.4%)      | 183 (18.2%)       | 0.08    |
|                        | 2                                                                        | 3284 (19.7%)      | 199 (19.8%)       |         |
|                        | 3                                                                        | 3356 (19.5%)      | 189 (18.8%)       |         |
|                        | 4                                                                        | 3453 (20.5%)      | 201 (20.0%)       |         |
|                        | 5                                                                        | 3343 (19.9%)      | 225 (22.4%)       |         |
|                        | Unknown                                                                  | 71 (0.4%)         | 9 (0.9%)          |         |
| Ethnic Group           | White                                                                    | 13190 (78.4%)     | 848 (84.3%)       | <0.001  |
|                        | Asian or Asian British                                                   | 348 (2.1%)        | 22 (2.2%)         |         |
|                        | Black or Black British                                                   | 271 (1.6%)        | 11 (1.1%)         |         |
|                        | Mixed                                                                    | 32 (0.2%)         | *                 |         |
|                        | Any other ethnic group                                                   | 184 (1.1%)        | 11 (1.1%)         |         |
|                        | Unknown                                                                  | 2797 (16.6%)      | 111 (11.0%)       |         |
| Comorbidities          | < 5                                                                      | 9456 (56.2%)      | 660 (65.6%)       | <0.001  |
|                        | 5 to 10                                                                  | 1953 (11.6%)      | 104 (10.3%)       |         |
|                        | 10 to 15                                                                 | 3519 (20.9%)      | 153 (15.2%)       |         |
|                        | 15 to 20                                                                 | 1128 (6.7%)       | 54 (5.4%)         |         |
|                        | > 20                                                                     | 766 (4.6%)        | 35 (3.5%)         |         |
| Type of Cancer         | C17 - Malignant Neoplasm of Small Intestine                              | 526 (3.1%)        | 41 (4.1%)         | <0.001  |
|                        | C22 - Malignant Neoplasm of Liver and Intrahepatic Bile Ducts            | 5069 (30.1%)      | 332 (33.0%)       |         |
|                        | C23 - Malignant Neoplasm of Gallbladder                                  | 715 (4.3%)        | 45 (4.5%)         |         |
|                        | C24 - Malignant Neoplasm of other and unspecified parts of biliary tract | 762 (4.5%)        | 74 (7.4%)         |         |
|                        | C25 - Malignant Neoplasm of Pancreas                                     | 9750 (58%)        | 514 (51.1%)       |         |
| Previous renal failure |                                                                          | 1747 (10.4%)      | 128 (12.7%)       |         |
| Previous ERCP          |                                                                          | 10384 (61.8%)     | 631 (62.7%)       |         |



## Validation

The number of PTBDs meeting the study criteria at UHB between April 2009 and April 2014 was 321 and the number of PTBDs coded in HES for UHB in the same time period was 305 (95%), suggesting misclassification in HES is unlikely. Univariate analysis comparing excluded and included patients is in table 1. There was no difference in gender between excluded and included patients. Excluded patients were younger (under 61 years of age (23.6% vs. 19.4%,  $p=0.005$ ),) more likely to be white (84.3% vs. 78.4%,  $p<0.001$ ), have less comorbidities (<5 65.6% vs. 56.2%,  $p<0.001$ ) and were less likely to have pancreatic cancer (51.1% vs. 58%,  $p<0.001$ ). Only 259 (1.3%) out of 19,525 patients were excluded for incomplete demographic data.

## Crude mortality and emergency readmission rates

5.2 (95% CI 4.9-5.6)% of patients died within 7 days of PTBD, 15.3 (95% CI 14.7 – 15.9)% died in hospital and 23.1 (95% CI 22.4 – 23.8)% died within 30 days of their first PTBD. Median survival was 92 (IQR 33 – 242) days and the median length of stay after PTBD was 9 (IQR 4 – 16) days. The emergency readmission rate within 30 days was 20.8 (95% CI 20.1-21.5)%.

## Complications

5.9% of patients suffered a complication within 7 days of their PTBD, and 20% within 3 months. Infection was the most common complication with 2.4% of patients experiencing this within a week, and 9% within a month (cholangitis 3.9%, sepsis 3.9%, bacterial infection of unspecified site 0.8%, cholecystitis 0.4%). 2.9% of patients had a code for stent displacement or blockage (mean time to stent blockage or displacement 6.3 (SD 8.6) months) and 2.1% for gastrointestinal haemorrhage. The rate of post-PTBD acute kidney injury was 0.9% within 7 days and 2.4% within 3 months.

## Chemotherapy

38.7% of patients under the age of 61 were coded as undergoing chemotherapy after their PTBD (table 2). This was less common in older patients: 62 – 68 years (30.4%), 69-74 (23.7%), 75-80 (13.5%) and  $\geq 81$  (2.5%) ( $p<0.001$ ). Patients with pancreatic cancer were the most likely to receive chemotherapy at 22.8%. Over the time period studied, more patients received chemotherapy after PTBD (2001/2002 13.1%, 2013/2014 27.3% ( $p<0.001$ )).

**Table 2 Rates of pre- and post-percutaneous transhepatic biliary drainage chemotherapy by age, cancer type and year of procedure**

| Type of Cancer                                                                  | Number of patients who had chemotherapy pre-PTBD | Number of patients who had chemotherapy post-PTBD | P-value |
|---------------------------------------------------------------------------------|--------------------------------------------------|---------------------------------------------------|---------|
| <b>C17 - Malignant Neoplasm of Small Intestine</b>                              | 73 (13.9%)                                       | 100 (19%)                                         | <0.001  |
| <b>C22 – Malignant Neoplasm of Liver and Intrahepatic Bile Ducts</b>            | 251 (5%)                                         | 1011 (19.9%)                                      |         |
| <b>C23 – Malignant Neoplasm of Gallbladder</b>                                  | 62 (8.7%)                                        | 122 (17.1%)                                       |         |
| <b>C24 – Malignant Neoplasm of other and unspecified parts of biliary tract</b> | 24 (3.1%)                                        | 76 (10%)                                          |         |
| <b>C25 Malignant Neoplasm of Pancreas</b>                                       | 855 (8.8%)                                       | 2219 (22.8%)                                      |         |
| <b>Age Group</b>                                                                |                                                  |                                                   |         |
| <61                                                                             | 462 (14.1%)                                      | 1263 (38.7%)                                      | <0.001  |
| 62-68                                                                           | 352 (11.4%)                                      | 937 (30.4%)                                       |         |
| 69-74                                                                           | 279 (8.6%)                                       | 771 (23.7%)                                       |         |
| 75-80                                                                           | 127 (3.7%)                                       | 461 (13.5%)                                       |         |
| ≥81                                                                             | 45 (1.2%)                                        | 96 (2.5%)                                         |         |
| <b>Year of PTBD</b>                                                             |                                                  |                                                   |         |
| 2001/2002                                                                       | 18 (2.0%)                                        | 115 (13.1%)                                       | <0.001  |
| 2002/2003                                                                       | 48 (4.9%)                                        | 137 (13.9%)                                       |         |
| 2003/2004                                                                       | 44 (4.8%)                                        | 142 (15.4%)                                       |         |
| 2004/2005                                                                       | 68 (6.6%)                                        | 173 (16.8%)                                       |         |
| 2005/2006                                                                       | 53 (4.7%)                                        | 206 (18.4%)                                       |         |
| 2006/2007                                                                       | 73 (6.0%)                                        | 247 (20.5%)                                       |         |
| 2007/2008                                                                       | 118 (8.9%)                                       | 286 (21.6%)                                       |         |
| 2008/2009                                                                       | 98 (7.1%)                                        | 305 (22.0%)                                       |         |
| 2009/2010                                                                       | 144 (9.2%)                                       | 345 (22.0%)                                       |         |
| 2010/2011                                                                       | 152 (9.6%)                                       | 362 (22.8%)                                       |         |
| 2011/2012                                                                       | 145 (8.9%)                                       | 384 (23.7%)                                       |         |
| 2012/2013                                                                       | 149 (9.4%)                                       | 387 (24.5%)                                       |         |
| 2013/2014                                                                       | 155 (9.6%)                                       | 439 (27.3%)                                       |         |

### Univariate regression analysis

Age, gender, comorbidity, deprivation, pre-existing renal failure, type of cancer, year of procedure and provider PTBD volume were all found to be associated with mortality and adjusted for in the subsequent multivariate analyses.

### Multivariate regression analysis

#### Demographic factors and mortality

The results of the multivariate regression analysis for demographic factors associated with mortality are shown in table 3. Age was strongly associated with mortality, with the  $\geq 81$  age group having the highest 7-day (2.87 (95% CI 2.23-3.69)  $p < 0.001$ ), in-hospital (3.47 (95% CI 2.97-4.05),  $p < 0.001$ ) and 30-day mortality (2.68 (95% CI 2.37-3.03),  $p < 0.001$ ). Females had a better outlook, with lower 7-day (0.82 (95% CI 0.71-0.95),  $p = 0.007$ ) and 30-day mortality (0.91 (95% CI 0.84-0.98),  $p = 0.011$ ).

30-day mortality was associated with deprivation (1.28 (95% CI 1.13-1.44),  $p < 0.001$ ), increased comorbidity (Charlson index 20+, 3.10 (95% CI 2.64-3.65),  $p < 0.001$ ) and pre-existing renal dysfunction (2.37 (95% CI 2.12-2.65),  $p < 0.001$ ), with 7-day mortality following a similar pattern.

Patients with unspecified bile duct cancer (1.28 (95% CI 1.08-1.52),  $p = 0.004$ ) or liver and intrahepatic bile duct cancer (1.14 (95% CI 1.14-1.24),  $p = 0.004$ ) had a higher 30-day mortality than those with pancreatic cancer. Patients undergoing ERCP prior to PTBD also had lower 30-day mortality (0.90 (95% CI 0.83-0.97),  $p = 0.007$ ).

**Table 3 Multivariate regression analysis of demographic and clinical factors associated with mortality following percutaneous transhepatic biliary drainage for unresectable malignant disease**

|                        |                                                                          | In-hospital mortality |         | 7-day mortality    |         | 30-Day Mortality   |         |
|------------------------|--------------------------------------------------------------------------|-----------------------|---------|--------------------|---------|--------------------|---------|
|                        |                                                                          | Odds Ratio            | P-value | Odds ratio         | P-value | Odds Ratio         | P-value |
| Age Group              | < 61                                                                     | 1 (baseline)          |         | 1 (baseline group) |         | 1 (baseline)       |         |
|                        | 62 to 68                                                                 | 1.49 (1.25-1.77)      | <0.001  | 1.28 (0.96-1.71)   | 0.095   | 1.33 (1.16-1.52)   | <0.001  |
|                        | 69 to 74                                                                 | 1.66 (1.40-1.96)      | <0.001  | 1.58 (1.20-2.08)   | 0.001   | 1.43 (1.25-1.63)   | <0.001  |
|                        | 75 to 80                                                                 | 2.36 (2.01-2.77)      | <0.001  | 2.20 (1.70-2.85)   | <0.001  | 1.89 (1.66-2.15)   | <0.001  |
|                        | ≥81                                                                      | 3.47 (2.97-4.05)      | <0.001  | 2.87 (2.23-3.69)   | <0.001  | 2.68 (2.37-3.03)   | <0.001  |
| Sex                    | Male                                                                     | 1 (baseline group)    |         | 1 (baseline group) |         | 1 (baseline group) |         |
|                        | Female                                                                   | 0.98 (0.89-1.07)      | 0.62    | 0.82 (0.71-0.95)   | 0.007   | 0.91 (0.84-0.98)   | 0.011   |
| Comorbidity Score      | < 5                                                                      | 1 (baseline group)    |         | 1 (baseline group) |         | 1 (baseline group) |         |
|                        | 5 to 10                                                                  | 1.39 (1.21-1.61)      | <0.001  | 1.46 (1.16-1.82)   | 0.001   | 1.38 (1.23-1.56)   | <0.001  |
|                        | 10 to 15                                                                 | 1.65 (1.47-1.85)      | <0.001  | 1.72 (1.44-2.06)   | <0.001  | 1.96 (1.78-2.16)   | <0.001  |
|                        | 15 to 20                                                                 | 2.15 (1.82-2.54)      | <0.001  | 2.12 (1.65-2.72)   | <0.001  | 2.29 (1.99-2.65)   | <0.001  |
|                        | 20+                                                                      | 2.96 (2.48-3.53)      | <0.001  | 2.76 (2.15-3.55)   | <0.001  | 3.10 (2.64-3.65)   | <0.001  |
| Deprivation Score      | 1 (most deprived)                                                        | 1.49 (1.29-1.72)      | <0.001  | 1.31 (1.05-1.64)   | 0.017   | 1.28 (1.13-1.44)   | <0.001  |
|                        | 2                                                                        | 1.31 (1.13-1.51)      | <0.001  | 1.12 (0.89-1.41)   | 0.32    | 1.21 (1.07-1.37)   | 0.002   |
|                        | 3                                                                        | 1.08 (0.94-1.36)      | 0.273   | 1.09 (0.87-1.36)   | 0.472   | 1.01 (0.90-1.29)   | 0.863   |
|                        | 4                                                                        | 1.18 (1.02-1.36)      | 0.026   | 1.06 (0.85-1.33)   | 0.601   | 1.14 (1.01-1.29)   | 0.03    |
|                        | 5 (least deprived)                                                       | 1 (baseline group)    |         | 1 (baseline group) |         | 1 (baseline group) |         |
| Previous renal failure |                                                                          | 3.48 (3.09-3.92)      | <0.001  | 2.94 (2.48-3.50)   | <0.001  | 2.37 (2.12-2.65)   | <0.001  |
| Type of Cancer         | C17 - Malignant Neoplasm of Small Intestine                              | 1.36 (1.07-1.73)      | 0.013   | 1.52 (1.07-2.15)   | 0.019   | 1.16 (0.94-1.44)   | 0.161   |
|                        | C22 - Malignant Neoplasm of Liver and Intrahepatic Bile Ducts            | 1.26 (1.14-1.39)      | <0.001  | 1.07 (0.91-1.26)   | 0.403   | 1.14 (1.04-1.24)   | 0.004   |
|                        | C23 - Malignant Neoplasm of Gallbladder                                  | 1.30 (1.05-1.61)      | 0.018   | 1.09 (0.76-1.56)   | 0.639   | 1.18 (0.98-1.42)   | 0.077   |
|                        | C24 - Malignant Neoplasm of other and unspecified parts of biliary tract | 1.33 (1.09-1.61)      | 0.005   | 1.16 (0.86-1.57)   | 0.336   | 1.28 (1.08-1.52)   | 0.004   |
|                        | C25 - Malignant Neoplasm of Pancreas                                     | 1 (baseline group)    |         | 1 (baseline group) |         | 1 (baseline group) |         |
| Previous ERCP          |                                                                          | 0.90 (0.82-0.99)      | 0.026   | 0.93 (0.80-1.08)   | 0.332   | 0.90 (0.83-0.97)   | 0.007   |

### Procedural factors and mortality

The results of the multivariate regression analysis of procedural factors associated with mortality are shown in table 4. There was a five-fold variation in 30-day mortality between providers, ranging from 9.1% to 50%. Compared with providers undertaking 1-15 PTBDs per year, there was a significantly decreased in-hospital and 30-day mortality in providers performing 28 – 43 PTBDs per year (0.72 (95% CI 0.62-0.83),  $p < 0.001$  and 0.79 (95% CI 0.69-0.89),  $p < 0.001$  respectively). In providers performing more than 44 PTBDs per year, there was an even larger decrease in in-hospital (0.68 (95% CI 0.57-0.82),  $p < 0.001$ ), 7-day (0.54 (95% CI 0.40-0.74),  $p < 0.001$ ) and 30-day mortality 0.63 (95% CI 0.54-0.74),  $p < 0.001$ ). The effect of provider volume on 30-day mortality can be seen in figure 2.

The day of procedure had little influence on mortality with only Sunday having a higher in-hospital (2.54 (95% CI 1.66-3.91),  $p < 0.001$ ) and 30-day mortality (2.20 (95% CI 1.47-3.28),  $p < 0.001$ ) compared to Monday to Thursday. However, the number of patients who had a PTBD on a Sunday was very small at 114 (0.7%) and therefore these results should be treated with caution. In-hospital mortality post-PTBD on multivariate analysis fell over the period studied, with persistently lower in-hospital mortality between 2013 and 2014 (0.58 (95% CI 0.45-0.74),  $p < 0.001$ ) compared to 2001/2002.

**Table 4 Multivariate regression analysis of procedural factors associated with mortality following percutaneous transhepatic biliary drainage for unresectable malignant disease**

|                                |                                      | In-hospital mortality |         | 7-Day Mortality    |         | 30-day mortality   |         |
|--------------------------------|--------------------------------------|-----------------------|---------|--------------------|---------|--------------------|---------|
|                                |                                      | Odds Ratio            | P-value | Odds Ratio         | P-value | Odds Ratio         | P-value |
| PTBD Volume per year           | ≤15                                  | 1 (baseline group)    |         | 1 (baseline group) |         | 1 (baseline group) |         |
|                                | 16 to 27                             | 0.79 (0.69-0.90)      | 0.001   | 0.92 (0.76-1.13)   | 0.44    | 0.93 (0.83-1.04)   | 0.218   |
|                                | 28 to 43                             | 0.72 (0.62-0.83)      | <0.001  | 0.81 (0.65-1.01)   | 0.063   | 0.79 (0.69-0.89)   | <0.001  |
|                                | 44 to 83                             | 0.68 (0.57-0.82)      | <0.001  | 0.54 (0.40-0.74)   | <0.001  | 0.63 (0.54-0.74)   | <0.001  |
|                                | 84 to 180                            | 0.68 (0.57-0.82)      | <0.001  | 0.71 (0.52-0.95)   | 0.023   | 0.68 (0.58-0.79)   | <0.001  |
| Pancreaticoduodenectomy Volume | ≤1                                   | 1 (baseline group)    |         | 1 (baseline group) |         | 1 (baseline group) |         |
|                                | 2 to 7                               | 0.96 (0.84-1.11)      | 0.603   | 0.91 (0.73-1.12)   | 0.364   | 0.90 (0.80-1.01)   | 0.073   |
|                                | 8 to 23                              | 1.08 (0.94-1.24)      | 0.278   | 0.97 (0.79-1.20)   | 0.79    | 0.99 (0.88-1.11)   | 0.814   |
|                                | 24 to 30                             | 1.12 (0.93-1.35)      | 0.226   | 0.88 (0.66-1.18)   | 0.397   | 0.93 (0.80-1.09)   | 0.377   |
|                                | 30 to 86                             | 1.01 (0.83-1.22)      | 0.96    | 0.87 (0.64-1.18)   | 0.371   | 0.95 (0.81-1.12)   | 0.549   |
| Day of Procedure               | Monday to Thursday                   | 1 (baseline group)    |         | 1 (baseline group) |         | 1 (baseline group) |         |
|                                | Friday                               | 1.09 (0.99-1.20)      | 0.089   | 0.93 (0.79-1.09)   | 0.346   | 0.99 (0.91-1.08)   | 0.794   |
|                                | Saturday                             | 1.16 (0.78-1.71)      | 0.464   | 1.18 (0.64-2.16)   | 0.596   | 1.05 (0.75-1.48)   | 0.776   |
|                                | Sunday                               | 2.54 (1.66-3.91)      | <0.001  | 3.69 (2.16-6.30)   | <0.001  | 2.20 (1.47-3.28)   | <0.001  |
|                                | Bank Holiday or Bank Holiday Weekend | 1.26 (0.98-1.61)      | 0.075   | 0.99 (0.65-1.51)   | 0.956   | 0.99 (0.79-1.25)   | 0.959   |
| Year of PTC                    | 2001/2                               | 1 (baseline group)    |         | 1 (baseline group) |         | 1 (baseline group) |         |
|                                | 2002/3                               | 1.11 (0.86-1.44)      | 0.426   | 1.15 (0.75-1.76)   | 0.526   | 1.05 (0.84-1.31)   | 0.669   |
|                                | 2003/4                               | 1.11 (0.85-1.45)      | 0.424   | 1.45 (0.96-2.19)   | 0.081   | 1.05 (0.84-1.31)   | 0.687   |
|                                | 2004/5                               | 1.07 (0.82-1.38)      | 0.635   | 1.02 (0.66-1.58)   | 0.913   | 1.03 (0.83-1.29)   | 0.775   |
|                                | 2005/6                               | 1.14 (0.88-1.47)      | 0.319   | 1.24 (0.83-1.87)   | 0.297   | 1.08 (0.87-1.34)   | 0.468   |
|                                | 2006/7                               | 1.03 (0.80-1.33)      | 0.803   | 1.04 (0.69-1.58)   | 0.852   | 1.03 (0.83-1.27)   | 0.82    |
|                                | 2007/8                               | 0.90 (0.70-1.16)      | 0.411   | 0.88 (0.58-1.33)   | 0.539   | 0.78 (0.63-0.97)   | 0.023   |
|                                | 2008/9                               | 0.93 (0.73-1.19)      | 0.571   | 1.20 (0.81-1.78)   | 0.366   | 0.96 (0.78-1.19)   | 0.728   |
|                                | 2009/10                              | 0.84 (0.66-1.08)      | 0.173   | 0.99 (0.67-1.47)   | 0.967   | 0.84 (0.68-1.03)   | 0.091   |
|                                | 2010/11                              | 0.70 (0.55-0.90)      | 0.005   | 0.71 (0.47-1.07)   | 0.104   | 0.78 (0.63-0.96)   | 0.019   |
|                                | 2011/12                              | 0.73 (0.57-0.94)      | 0.013   | 0.89 (0.60-1.33)   | 0.579   | 0.86 (0.70-1.05)   | 0.136   |
|                                | 2012/13                              | 0.71 (0.56-0.91)      | 0.006   | 0.80 (0.54-1.19)   | 0.281   | 0.92 (0.75-1.13)   | 0.428   |
|                                | 2013/14                              | 0.58 (0.45-0.74)      | <0.001  | 0.71 (0.48-1.06)   | 0.094   | 0.65 (0.53-0.81)   | <0.001  |

### Repeat PTBD

The results of the multivariate analyses of factors associated with needing a further PTBD are shown in Table 5. Patients undergoing an additional PTBD procedure within 2 months of their initial PTBD were younger (81+ years, 0.21 (95% CI 0.16-0.27),  $p < 0.001$ ), less likely to have comorbidities (20+, 0.45 (95% CI 0.29-0.70),  $p < 0.001$ ) and were more likely to have cholangiocarcinoma (2.05 (95% CI 1.77-2.37),  $p < 0.001$ ). Patients undergoing their procedure in a high-volume centre performing between 84 and 180 procedures per year were much less likely to require a second procedure within 2 months (0.47 (95% CI 0.36-0.62),  $p < 0.001$ ). The majority of patients underwent a repeat PTBD in the same centre, with only 222 patients (22.1%) being referred to another provider. Repeat PTBD procedures were usually undertaken during emergency admissions (62.4%) rather than elective episodes (37.6%). 1,923 patients (11.4%) underwent an ERCP within 2 months of their initial PTBD.

**Table 5 Multivariate regression analysis of factors associated with the need for a second percutaneous transhepatic biliary drainage for unresectable malignant disease**

|                      |                                                                          | Odds Ratio         | P-value |
|----------------------|--------------------------------------------------------------------------|--------------------|---------|
| Age Group            | <61                                                                      | 1 (baseline group) |         |
|                      | 62 to 68                                                                 | 0.81 (0.68 - 0.97) | 0.026   |
|                      | 69 to 74                                                                 | 0.67 (0.56 - 0.81) | <0.001  |
|                      | 75 to 80                                                                 | 0.50 (0.41 - 0.61) | <0.001  |
|                      | 81 +                                                                     | 0.21 (0.16 - 0.27) | <0.001  |
| Sex                  | Male                                                                     | 1 (baseline group) |         |
|                      | Female                                                                   | 0.84 (0.74 - 0.96) | 0.01    |
| Comorbidity Score    | < 5                                                                      | 1 (baseline group) |         |
|                      | 5 to 10                                                                  | 0.86 (0.70 - 1.06) | 0.161   |
|                      | 10 to 15                                                                 | 0.70 (0.59 - 0.83) | <0.001  |
|                      | 15 to 20                                                                 | 0.30 (0.20 - 0.45) | <0.001  |
|                      | 20+                                                                      | 0.45 (0.29 - 0.70) | <0.001  |
| Spell Year           | 2001/02                                                                  | 1 (baseline group) |         |
|                      | 2002/03                                                                  | 1.07 (0.69 - 1.67) | 0.757   |
|                      | 2003/04                                                                  | 1.00 (0.63 - 1.57) | 0.997   |
|                      | 2004/05                                                                  | 0.94 (0.60 - 1.48) | 0.803   |
|                      | 2005/06                                                                  | 0.91 (0.58 - 1.42) | 0.664   |
|                      | 2006/07                                                                  | 1.32 (0.88 - 1.99) | 0.186   |
|                      | 2007/08                                                                  | 1.24 (0.82 - 1.86) | 0.308   |
|                      | 2008/09                                                                  | 1.52 (1.03 - 2.26) | 0.035   |
|                      | 2009/10                                                                  | 1.78 (1.22 - 2.60) | 0.003   |
|                      | 2010/11                                                                  | 1.57 (1.07 - 2.31) | 0.022   |
|                      | 2011/12                                                                  | 1.99 (1.37 - 2.90) | <0.001  |
| 2012/13              | 2.02 (1.39 - 2.94)                                                       | <0.001             |         |
| 2013/14              | 1.91 (1.31 - 2.79)                                                       | 0.001              |         |
| Deprivation score    | 1 (most deprived)                                                        | 0.78 (0.63 - 0.97) | 0.023   |
|                      | 2                                                                        | 0.97 (0.79 - 1.19) | 0.792   |
|                      | 3                                                                        | 0.94 (0.77 - 1.15) | 0.543   |
|                      | 4                                                                        | 0.99 (0.81 - 1.21) | 0.918   |
|                      | 5 (least deprived)                                                       | 1 (baseline group) |         |
| PTBD Volume per year | <=15                                                                     | 1 (baseline group) |         |
|                      | 16 to 27                                                                 | 0.72 (0.60 - 0.87) | 0.001   |
|                      | 28 to 43                                                                 | 0.40 (0.32 - 0.50) | <0.001  |
|                      | 44 to 83                                                                 | 0.55 (0.42 - 0.72) | <0.001  |
|                      | 84 to 180                                                                | 0.47 (0.36 - 0.62) | <0.001  |
| Type of Cancer       | C17 - Malignant Neoplasm of Small Intestine                              | 1.47 (1.02-2.11)   | 0.038   |
|                      | C22 - Malignant Neoplasm of Liver and Intrahepatic Bile Ducts            | 2.05 (1.77-2.37)   | <0.001  |
|                      | C23 - Malignant Neoplasm of Gallbladder                                  | 1.68 (1.23-2.31)   | 0.001   |
|                      | C24 - Malignant Neoplasm of other and unspecified parts of biliary tract | 1.12 (0.77-1.63)   | 0.55    |
|                      | C25 - Malignant Neoplasm of Pancreas                                     | 1 (baseline group) |         |



## DISCUSSION

This is the largest study to date examining the outcomes of patients undergoing PTBD for unresectable malignant biliary tract obstruction. 7-day and 30-day mortality was 5.2% and 23.1% respectively with a median survival of 92 days. Reported 30-day mortality rates following PTBD vary considerably in the literature. In a 2008 review examining PTBD case series, 30-day mortality for patients with distal biliary obstruction varied from 2 to 20% and for hilar lesions from 9 to 20%, (2). However, 30-day mortality has been reported to be as high as 39% in other case series, (3, 12-14). In 2012, the results of a large UK audit of biliary drainage and stenting procedures were published. This showed an in-hospital mortality of 19.8% in those with malignant biliary obstruction, (15). Finally, a 2018 randomised controlled trial examining outcomes in patients with perihilar cholangiocarcinoma was stopped prematurely because of a higher mortality in the PTBD group compared to the endoscopic group (41 vs. 11%), (16).

Surgical or endoscopic drainage of the biliary system was not examined in the present study. Surgical drainage is associated with higher postoperative mortality and morbidity and an increased length of stay compared to non-surgical intervention, (17-20). The choice between endoscopic or percutaneous biliary drainage is less clear, as few randomized trials exist, (21). The decision often depends on the level of biliary obstruction. In England, PTBD is often the preferred technique for lesions above the common hepatic duct and when ERCP has failed, (8, 22). Endoscopic drainage, if technically possible, is probably perceived to be safer due to a small, very old, prospective randomized trial from 1987 in hilar and distal bile duct obstruction comparing the two techniques. The endoscopic approach had a higher success rate (81% vs. 61%,  $p=0.017$ ) and a lower 30-day mortality (15% vs. 33%,  $p=0.016$ ), (23). However, only plastic stents were used in this study, which does not reflect current practice. There is only one randomized trial comparing PTBD with ERCP in hilar biliary obstruction due to gallbladder cancer, (3). This demonstrated that PTBD had a higher success rate than ERCP (89% vs. 41%,  $p < 0.001$ ) and a lower rate of early cholangitis (11% vs. 48%,  $p = 0.02$ ). In a recent meta-analysis comparing PTBD with ERCP for the relief of malignant jaundice, patients undergoing PTBD were less likely to develop cholangitis compared to ERCP (0.55 (95% CI 0.36-0.84),  $p=0.006$ ). However, there was no difference in success rate or 30-day mortality between the two approaches, (24).

The regression analysis in the present study identified patients with an increased risk of death post PTBD. Older males, with increasing deprivation and comorbidity (especially pre-existing renal dysfunction), and those with a cancer type other than pancreatic had a worse prognosis. Over 60% of patients in our cohort underwent a prior ERCP and this was expected, given that 62.5% of the patients had pancreatic or extra-hepatic cholangiocarcinoma. Undergoing an ERCP prior to PTBD was

1  
2  
3 associated with lower mortality. This likely to be due to a high proportion of those  
4 patients undergoing ERCP having pancreatic cancer, which carried a better  
5 prognosis. Patient fitness to undergo a second biliary drainage procedure was also a  
6 likely contributing factor. A reduced mortality in providers performing a higher  
7 volume of PTBDs each year was identified. A number of factors may contribute to  
8 this difference including variability in peri-procedural care such as antibiotics and  
9 post-procedure management of complications such as sepsis and renal failure.  
10 Higher volume centres may also have a more rigorous approach to patient  
11 selection, with a greater emphasis on careful multi-disciplinary team discussion of  
12 management prior to PTBD. We recognise that it is not realistic to expect all  
13 patients to be transferred to high volume centres for PTBD but the authors would  
14 recommend that PTBD outcomes are audited regularly and peri-procedural  
15 practices from high volume centres with good outcomes adopted in low volume  
16 centres.  
17  
18  
19  
20  
21  
22  
23

24 Biliary obstruction in malignancy may result in pruritus, pain, cholangitis and liver  
25 failure, (1, 2). The goal of biliary drainage in inoperable patients is to improve  
26 quality of life and, in those with a good performance status, allow palliative  
27 chemotherapy. Two studies have shown that biliary drainage can improve quality of  
28 life, (3, 4) and it has been shown that gemcitabine-based combinations improve  
29 progression free survival in pancreatic cancer (HR 0.91 (95% CI 0.42-1.31), (5). A  
30 combination of gemcitabine and cisplatin can improve median survival in advanced  
31 biliary tract cancer from 8.1 to 11.7 months (HR 0.64 (95% CI 0.52 - 0.80),  $p < 0.001$ ),  
32 (6, 7). However, in our study, it is important to recognise that when considering  
33 PTBD, most patients did not receive chemotherapy after their procedure, with the  
34 rates decreasing significantly with age (aged <40 years (40.7% chemotherapy), aged  
35 70 to 80 (17.4%), aged over 80 (2.5%)).  
36  
37  
38  
39  
40  
41  
42

43 The rate of coded post-procedural complications in our study was high. 5.9% of  
44 patients were coded as experiencing a serious complication within 7 days, and  
45 20.2% within 3 months. However, it was not possible to clarify the relationship  
46 between these later complications and the procedure or the underlying  
47 malignancy. Complication rates after PTBD vary between case series from 7 to 30%,  
48 (2), but cholangitis was common with rates of between 9 and 11% reported, (3, 12-  
49 14). The UK audit reported a minor complication rate of 26% and a major  
50 complication rate of 7.9%, including a 3.5% rate of sepsis, (16). It has therefore  
51 been recommended that all patients undergoing percutaneous drainage receive  
52 prophylactic antibiotics prior to their procedure, (25-28). However, there are no  
53 national or international guidelines to date on this issue. Rates of cholangitis in  
54 these studies were higher in patients with a low serum albumin or raised CRP,  
55 those with proximal or multiple points of intrahepatic biliary obstruction, neoplastic  
56  
57  
58  
59  
60

1  
2  
3 invasion or compression of the duodenum and if *Staphylococcus aureus* was  
4 present at the site of skin puncture. With these factors in mind, patients should be  
5 monitored closely post-PTBD for early signs of sepsis, and infection treated  
6 aggressively with intravenous antibiotics and fluids. Stent occlusion due to the  
7 deposition of a bacterial biofilm and biliary sludge or tumour overgrowth is an  
8 important late complication, (29). In the present study, stent blockage or  
9 displacement was coded in 6.2% of patients and rates in other series have been  
10 reported at between 5 and 27%, (2, 30, 17). 13.5% of patients in the current study  
11 underwent more than one PTBD procedure. A 2008 review of PTBD series reported  
12 recurrence of obstructive jaundice in between 5 and 25% of patients, with the  
13 majority undergoing a repeat PTBD, (2).

14  
15  
16  
17  
18  
19  
20 Every healthcare provider in England is required to submit diagnostic and  
21 procedural data to HES. However, the accuracy of the coding data submitted is a  
22 potential concern as it depends on the quality of the medical records and on the  
23 staff coding the records. HES produces a yearly report on the quality of the data  
24 received. In the 2012/2013 report, 99.3% of primary diagnoses and 99.9% of  
25 primary procedure codes were accurate, (31). In order to validate the accuracy of  
26 diagnostic and procedural coding relevant to the present study, the number of  
27 PTBDs meeting the study criteria at UHB between 2009 and 2014 was compared to  
28 the number submitted to HES. 321 patients were recorded in HES as undergoing  
29 PTBD at UHB and 305 patients were identified from examining local radiology data,  
30 giving an accuracy of 95%. HES data is unfortunately not linked to cancer registry  
31 data, due to restrictions under which the data is held. Patients were therefore  
32 excluded who had very long periods following an apparent diagnosis of malignancy  
33 and PTBD and those with long delays in cancer diagnosis following PTBD. There are  
34 some important aspects of the patient's care that are not recorded in HES.  
35 Information regarding the exact location of the lesion, the precise technique used  
36 (such as use of external drainage or type of stent placed) and whether the  
37 procedure was performed with ultrasound guidance, by a supervised trainee, or by  
38 an experienced interventional radiologist was not available. Important data such as  
39 whether any technical difficulties were encountered, performance status, bilirubin  
40 and albumin levels, clotting profile or inflammatory markers were also not  
41 available. In particular, prescription data regarding antibiotic use is not recorded,  
42 which limits our ability to investigate further the high frequency of septic  
43 complications. Recording of chemotherapy in HES may also not be entirely  
44 complete, (31).

45  
46  
47  
48  
49  
50  
51  
52  
53  
54  
55  
56  
57 In conclusion, 30-day mortality in patients undergoing PTBD for relief of  
58 unresectable malignant biliary obstruction was high at 23.1%. Older males and  
59 those with increasing comorbidity (especially pre-existing renal dysfunction) and  
60

1  
2  
3 deprivation have a poorer prognosis. Patients undergoing a PTBD in a provider that  
4 performs more than 28 procedures per year have a significantly lower risk of death  
5 and there is a large variation in outcomes between providers. In light of the high  
6 mortality found in this study, the authors strongly recommend that patients  
7 undergo careful multi-disciplinary discussion prior to PTBD in order to identify risk  
8 factors for a poor outcome, to treat renal dysfunction and sepsis early, and to  
9 confirm that the patient is likely to benefit from PTBD, in terms of either symptom  
10 relief or as a bridge to chemotherapy.  
11  
12  
13  
14  
15  
16

### 17 **Acknowledgements**

18  
19  
20 The authors would like to acknowledge the contribution of Mr. Keith Roberts,  
21 consultant hepato-biliary surgeon at University Hospital Birmingham, with  
22 identifying relevant surgical procedures.  
23  
24  
25

### 26 **Author contributions:**

27  
28 **James Rees:** First author, study concept and design, data interpretation, drafting of  
29 manuscript  
30

31 **Jemma Mytton:** Acquisition of data, data analysis

32 **Felicity Evison:** Acquisition of data, data analysis

33 **Kamarjit Singh Mangat:** Study concept and design, critical revision of manuscript  
34 for important intellectual content  
35

36 **Prashant Patel:** Study concept and design, data interpretation, critical revision of  
37 manuscript for important intellectual content  
38

39 **Nigel Trudgill:** Senior author, study concept and design, data interpretation,  
40 drafting of manuscript, study supervision  
41  
42  
43

### 44 **Funding:**

45  
46 This research received no specific grant from any funding agency in the public,  
47 commercial or not-for-profit sectors  
48  
49

### 50 **Conflict of interests:**

51  
52 Kamarjit Singh Mangat is the inventor of a biliary biopsy forceps kit that was first  
53 licensed in 2013. The rights have been transferred to Cook Medical and he receives  
54 minimal royalties for sales of this device.  
55  
56

### 57 **Data Availability Statement:**

All data relevant to the study are included in the article or uploaded as supplementary information

### Figure 1 Study Flowchart

### Figure 2 Kaplan Meier unadjusted analysis of 30-day mortality following percutaneous transhepatic biliary drainage for unresectable malignant disease by provider volume

### References

1. Chu D, Adler DG. Malignant biliary tract obstruction: evaluation and therapy. *J Natl Compr Cancer Netw* 2010;8:1033–44.
2. Van Delden OM, Laméris JS. Percutaneous drainage and stenting for palliation of malignant bile duct obstruction. *Eur Radiol* 2008;18:448–56.
3. Saluja SS, Gulati M, Garg PK, et al. Endoscopic or percutaneous biliary drainage for gallbladder cancer: a randomized trial and quality of life assessment. *Clin Gastroenterol Hepatol* 2008;6:944–950.
4. Barkay O, Mosler P, Schmitt CM, et al. Effect of endoscopic stenting of malignant bile duct obstruction on quality of life. *J Clin Gastroenterol* 2013;47:526–31.
5. Sultana A, Smith CT, Cunningham D, et al. Meta-analyses of chemotherapy for locally advanced and metastatic pancreatic cancer. *J Clin Oncol* 2007;25:2607–15.
6. Valle J, Wasan H, Palmer DH, et al. Cisplatin plus gemcitabine versus gemcitabine for biliary tract cancer. *N Engl J Med* 2010;362: 1273–81.
7. Valle JW, Wasan H, Johnson P, et al. Gemcitabine alone or in combination with cisplatin in patients with advanced or metastatic cholangiocarcinomas or other biliary tract tumours: a multicentre randomised phase II study - The UK ABC-01 Study. *Br J Cancer* 2009;101:621–7.
8. Silva MA, Tekin K, Aytakin F, et al. Surgery for hilar cholangiocarcinoma; a 10 year experience of a tertiary referral centre in the UK. *Eur J Surg Oncol* 2005;31:533–9.
9. Health and Social Care Information Centre. Hospital Episode Statistics; [www.hscic.gov.uk/hes](http://www.hscic.gov.uk/hes) (Accessed June 2018).
10. Nuttall M, van der Meulen J, Emberton M. Charlson scores based on ICD-10 administrative data were valid in assessing comorbidity in patients undergoing urological cancer surgery. *J Clin Epidemiol* 2006;59:265–73.
11. Office for National Statistics. Index of Multiple Deprivation (IMD) 2007. [https://data.gov.uk/dataset/index\\_of\\_multiple\\_deprivation\\_imd\\_2007](https://data.gov.uk/dataset/index_of_multiple_deprivation_imd_2007) (Accessed June 2018)

12. Stoker J, Laméris JS, van Blankenstein M. Percutaneous metallic self-expandable endoprostheses in malignant hilar biliary obstruction. *Gastrointest Endosc* 1993;39:43–9.
13. Inal M, Akgül E, Aksungur E, et al. Percutaneous placement of biliary metallic stents in patients with malignant hilar obstruction: unilobar versus bilobar drainage. *J Vasc Interv Radiol* 2003;14:1409–16.
14. Schima W, Prokesch R, Osterreicher C, et al. Biliary Wallstent endoprosthesis in malignant hilar obstruction: long-term results with regard to the type of obstruction. *Clin Radiol* 1997;52:213–9.
15. Uberoi R, Das N, Moss J, et al. British Society of Interventional Radiology: biliary drainage and stenting registry (BDSR). *Cardiovascular and interventional radiology*. 2012;1;35(1):127-38.
16. Coelen RJ, Roos E, Wiggers JK, et al. Endoscopic versus percutaneous biliary drainage in patients with resectable perihilar cholangiocarcinoma: a multicentre, randomised controlled trial. *The Lancet Gastroenterology & Hepatology* 2018;1;3(10):681-90.
17. Smith AC, Dowsett JF, Russell RC, et al. Randomised trial of endoscopic stenting versus surgical bypass in malignant low bile duct obstruction. *Lancet* 1994;344:1655–60.
18. Andersen JR, Sørensen SM, Kruse A, et al. Randomised trial of endoscopic endoprosthesis versus operative bypass in malignant obstructive jaundice. *Gut* 1989;30:1132–5.
19. Hyöty MK, Nordback IH. Biliary stent or surgical bypass in unresectable pancreatic cancer with obstructive jaundice. *Acta Chir Scand* 1990;156:391–6.
20. Shepherd HA, Royle G, Ross AP, et al. Endoscopic biliary endoprosthesis in the palliation of malignant obstruction of the distal common bile duct: a randomized trial. *Br J Surg* 1988;75:1166–8.
21. Ho CS, Warkentin AE. Evidence-based decompression in malignant biliary obstruction. *Korean J Radiol* 2012;13(Suppl 1):S56-61.
22. Hatzidakis A, Adam A. The interventional radiological management of cholangiocarcinoma. *Clin Radiol* 2003;58:91–6.
23. Speer AG, Christopher R, Russell G, et al. Randomised trial of endoscopic versus percutaneous stent insertion in malignant obstructive jaundice. *Lancet* 1987;2:57–62.
24. Zhao XQ, Dong JH, Jiang K, et al. Comparison of percutaneous transhepatic biliary drainage and endoscopic biliary drainage in the management of malignant biliary tract obstruction: a meta-analysis. *Dig Endosc* 2015;27:137–45.
25. Saad WE, Wallace MJ, Wojak JC, et al. Quality improvement guidelines for percutaneous transhepatic cholangiography, biliary drainage, and percutaneous cholecystostomy. *J Vasc Interv Radiol* 2010;21:789–95.

- 1
- 2
- 3 26. Audisio RA, Bozzetti F, Severini A, et al. The occurrence of cholangitis after
- 4 percutaneous biliary drainage: evaluation of some risk factors. *Surgery*
- 5 1988;103:507–12.
- 6
- 7 27. Nomura T, Shirai Y, Hatakeyama K. Bacteribilia and cholangitis after
- 8 percutaneous transhepatic biliary drainage for malignant biliary obstruction.
- 9 *Dig Dis Sci* 1999;44:542–6.
- 10
- 11 28. Ahn S, Lee YS, Lim KS, et al. Malignant biliary obstructions: can we predict
- 12 immediate postprocedural cholangitis after percutaneous biliary drainage?
- 13 *Support Care Cancer* 2013;21: 2321–6.
- 14
- 15 29. Leung JW, Ling TK, Kung JL, et al. The role of bacteria in the blockage of
- 16 biliary stents. *Gastrointest Endosc* 1988;34:19–22.
- 17
- 18 30. Stoker J, Laméris JS, Jeekel J. Percutaneously placed Wallstent
- 19 endoprosthesis in patients with malignant distal biliary obstruction. *Br J Surg*
- 20 1993;80:1185–7.
- 21
- 22 31. Health and Social Care Information Centre. The Quality of Nationally
- 23 Submitted Health and Social Care Data England, Annual Report, 2013,
- 24 Experimental Statistics (Accessed July 2019).
- 25 [https://files.digital.nhs.uk/publicationimport/pub11xxx/pub11530/second-](https://files.digital.nhs.uk/publicationimport/pub11xxx/pub11530/second-annu-data-qual-rep-2013.pdf)
- 26 [annu-data-qual-rep-2013.pdf](https://files.digital.nhs.uk/publicationimport/pub11xxx/pub11530/second-annu-data-qual-rep-2013.pdf)
- 27
- 28
- 29
- 30
- 31
- 32
- 33
- 34
- 35
- 36
- 37
- 38
- 39
- 40
- 41
- 42
- 43
- 44
- 45
- 46
- 47
- 48
- 49
- 50
- 51
- 52
- 53
- 54
- 55
- 56
- 57
- 58
- 59
- 60

1  
2  
3  
4  
5  
6  
7  
8  
9  
10  
11  
12  
13  
14  
15  
16  
17  
18  
19  
20  
21  
22  
23  
24  
25  
26  
27  
28  
29  
30  
31  
32  
33  
34  
35  
36  
37  
38  
39  
40  
41  
42  
43  
44  
45  
46  
47  
48  
49  
50  
51  
52  
53  
54  
55  
56  
57  
58  
59  
60

For peer review only



Figure 1 Study Flowchart

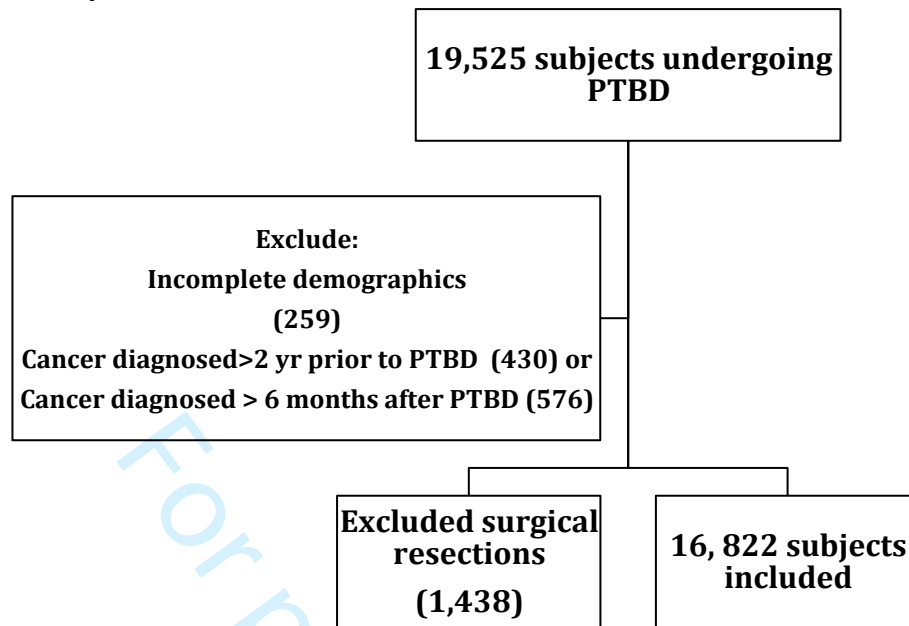

Figure 2 Kaplan Meier unadjusted analysis of 30-day mortality following percutaneous transhepatic biliary drainage for unresectable malignant disease by provider volume

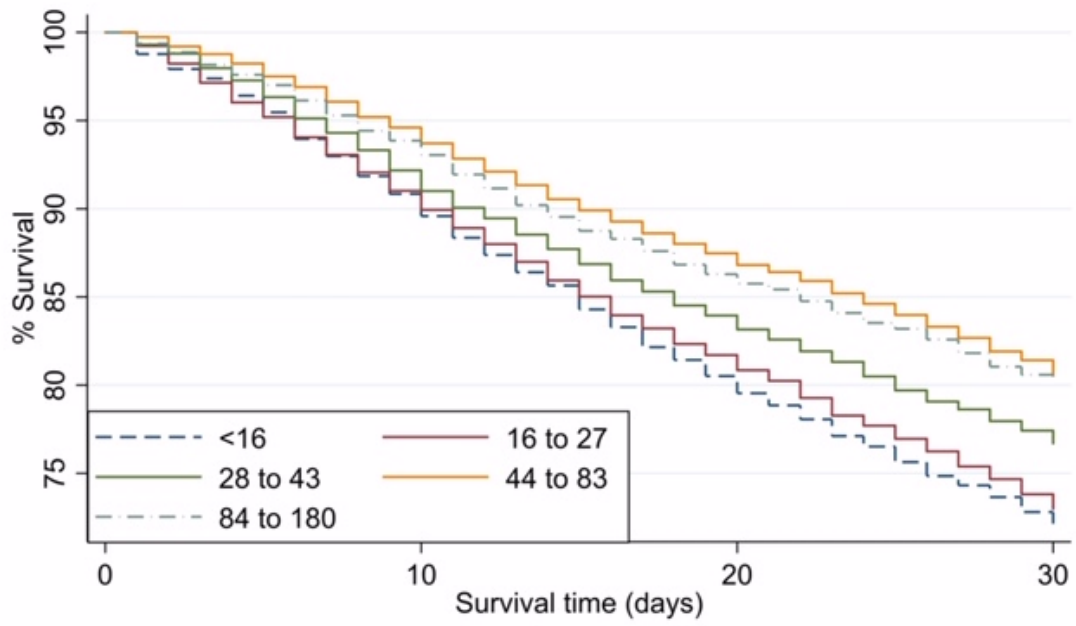

review only

**STROBE 2007 (v4) Statement—Checklist of items that should be included in reports of cohort studies**

| Section/Topic                | Item # | Recommendation                                                                                                                                                                       | Reported on page # |
|------------------------------|--------|--------------------------------------------------------------------------------------------------------------------------------------------------------------------------------------|--------------------|
| <b>Title and abstract</b>    | 1      | (a) Indicate the study's design with a commonly used term in the title or the abstract                                                                                               | 1                  |
|                              |        | (b) Provide in the abstract an informative and balanced summary of what was done and what was found                                                                                  | 2                  |
| <b>Introduction</b>          |        |                                                                                                                                                                                      |                    |
| Background/rationale         | 2      | Explain the scientific background and rationale for the investigation being reported                                                                                                 | 4                  |
| Objectives                   | 3      | State specific objectives, including any prespecified hypotheses                                                                                                                     | 4                  |
| <b>Methods</b>               |        |                                                                                                                                                                                      |                    |
| Study design                 | 4      | Present key elements of study design early in the paper                                                                                                                              | 5-7                |
| Setting                      | 5      | Describe the setting, locations, and relevant dates, including periods of recruitment, exposure, follow-up, and data collection                                                      | 5                  |
| Participants                 | 6      | (a) Give the eligibility criteria, and the sources and methods of selection of participants. Describe methods of follow-up                                                           | 5                  |
|                              |        | (b) For matched studies, give matching criteria and number of exposed and unexposed                                                                                                  | N/A                |
| Variables                    | 7      | Clearly define all outcomes, exposures, predictors, potential confounders, and effect modifiers. Give diagnostic criteria, if applicable                                             | 6                  |
| Data sources/<br>measurement | 8*     | For each variable of interest, give sources of data and details of methods of assessment (measurement). Describe comparability of assessment methods if there is more than one group | 6-7                |
| Bias                         | 9      | Describe any efforts to address potential sources of bias                                                                                                                            | 5, 6               |
| Study size                   | 10     | Explain how the study size was arrived at                                                                                                                                            | 5                  |
| Quantitative variables       | 11     | Explain how quantitative variables were handled in the analyses. If applicable, describe which groupings were chosen and why                                                         | 6-7                |
| Statistical methods          | 12     | (a) Describe all statistical methods, including those used to control for confounding                                                                                                | 5-7                |
|                              |        | (b) Describe any methods used to examine subgroups and interactions                                                                                                                  | 5-7                |
|                              |        | (c) Explain how missing data were addressed                                                                                                                                          | 5                  |
|                              |        | (d) If applicable, explain how loss to follow-up was addressed                                                                                                                       | N/A                |
|                              |        | (e) Describe any sensitivity analyses                                                                                                                                                | 6-7                |
| <b>Results</b>               |        |                                                                                                                                                                                      |                    |

|                          |     |                                                                                                                                                                                                              |       |
|--------------------------|-----|--------------------------------------------------------------------------------------------------------------------------------------------------------------------------------------------------------------|-------|
| Participants             | 13* | (a) Report numbers of individuals at each stage of study—eg numbers potentially eligible, examined for eligibility, confirmed eligible, included in the study, completing follow-up, and analysed            | 8     |
|                          |     | (b) Give reasons for non-participation at each stage                                                                                                                                                         | 8     |
|                          |     | (c) Consider use of a flow diagram                                                                                                                                                                           | 8     |
| Descriptive data         | 14* | (a) Give characteristics of study participants (eg demographic, clinical, social) and information on exposures and potential confounders                                                                     | 8     |
|                          |     | (b) Indicate number of participants with missing data for each variable of interest                                                                                                                          | 8     |
|                          |     | (c) Summarise follow-up time (eg, average and total amount)                                                                                                                                                  | 8     |
| Outcome data             | 15* | Report numbers of outcome events or summary measures over time                                                                                                                                               | 8-10  |
| Main results             | 16  | (a) Give unadjusted estimates and, if applicable, confounder-adjusted estimates and their precision (eg, 95% confidence interval). Make clear which confounders were adjusted for and why they were included | 8-10  |
|                          |     | (b) Report category boundaries when continuous variables were categorized                                                                                                                                    | 8-10  |
|                          |     | (c) If relevant, consider translating estimates of relative risk into absolute risk for a meaningful time period                                                                                             | N/A   |
| Other analyses           | 17  | Report other analyses done—eg analyses of subgroups and interactions, and sensitivity analyses                                                                                                               | 8-10  |
| <b>Discussion</b>        |     |                                                                                                                                                                                                              |       |
| Key results              | 18  | Summarise key results with reference to study objectives                                                                                                                                                     | 11-13 |
| <b>Limitations</b>       |     |                                                                                                                                                                                                              | 13    |
| Interpretation           | 20  | Give a cautious overall interpretation of results considering objectives, limitations, multiplicity of analyses, results from similar studies, and other relevant evidence                                   | 11-13 |
| Generalisability         | 21  | Discuss the generalisability (external validity) of the study results                                                                                                                                        | 11    |
| <b>Other information</b> |     |                                                                                                                                                                                                              |       |
| Funding                  | 22  | Give the source of funding and the role of the funders for the present study and, if applicable, for the original study on which the present article is based                                                | N/A   |

\*Give information separately for cases and controls in case-control studies and, if applicable, for exposed and unexposed groups in cohort and cross-sectional studies.

**Note:** An Explanation and Elaboration article discusses each checklist item and gives methodological background and published examples of transparent reporting. The STROBE checklist is best used in conjunction with this article (freely available on the Web sites of PLoS Medicine at <http://www.plosmedicine.org/>, Annals of Internal Medicine at <http://www.annals.org/>, and Epidemiology at <http://www.epidem.com/>). Information on the STROBE Initiative is available at [www.strobe-statement.org](http://www.strobe-statement.org).
